# Supplementary material
Source: MDPI journal article supplement (https://www.mdpi.com/2072-4292/10/9/1494)
Supplement: s1 [file s1]

# Day 8 (Survey 3)

Processing Report  
13 February 2018

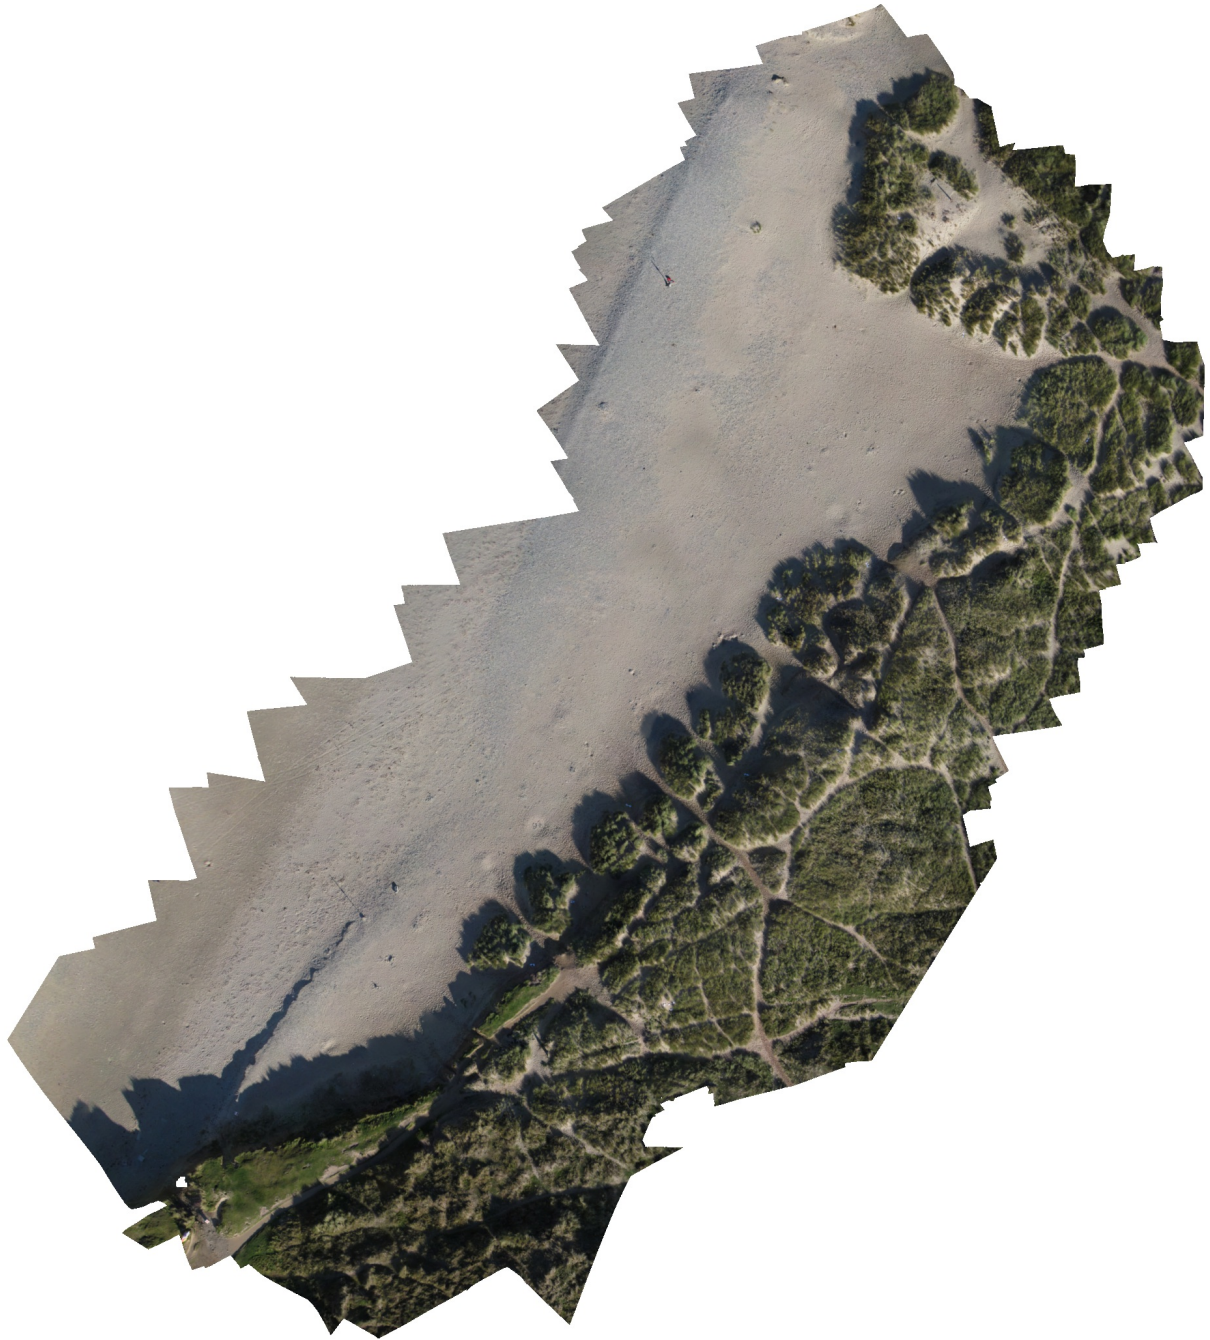

# Survey Data

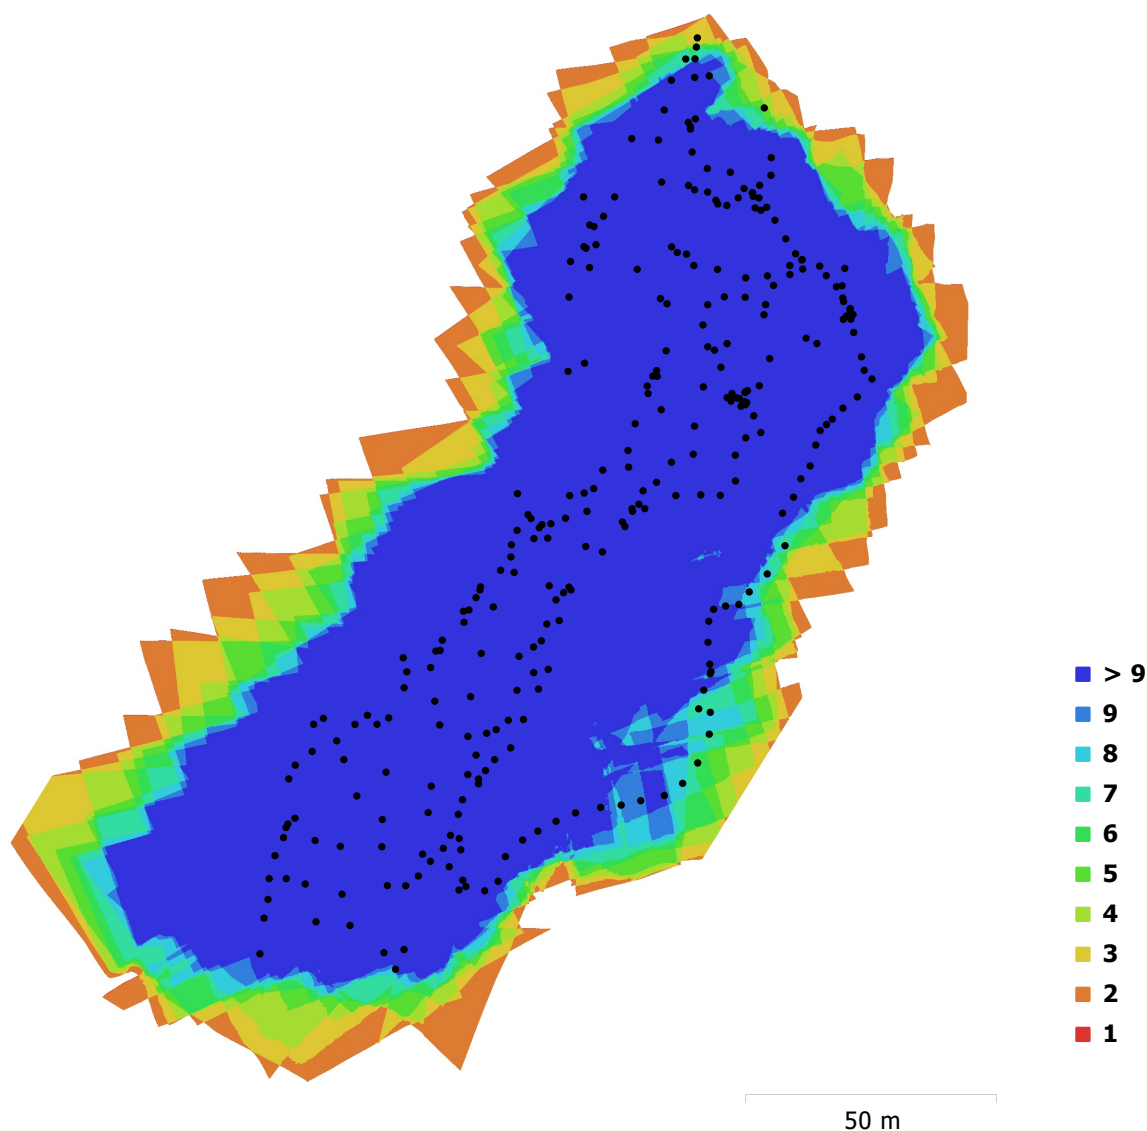

Fig. 1. Camera locations and image overlap.

|                    |                        |                     |           |
|--------------------|------------------------|---------------------|-----------|
| Number of images:  | 298                    | Camera stations:    | 298       |
| Flying altitude:   | 34.5 m                 | Tie points:         | 1,452,172 |
| Ground resolution: | 9.78 mm/pix            | Projections:        | 8,002,133 |
| Coverage area:     | 0.0202 km <sup>2</sup> | Reprojection error: | 0.697 pix |

| Camera Model               | Resolution  | Focal Length | Pixel Size     | Precalibrated |
|----------------------------|-------------|--------------|----------------|---------------|
| Canon PowerShot D30 (5 mm) | 4000 x 3000 | 5 mm         | 1.55 x 1.55 μm | No            |

Table 1. Cameras.

# Camera Calibration

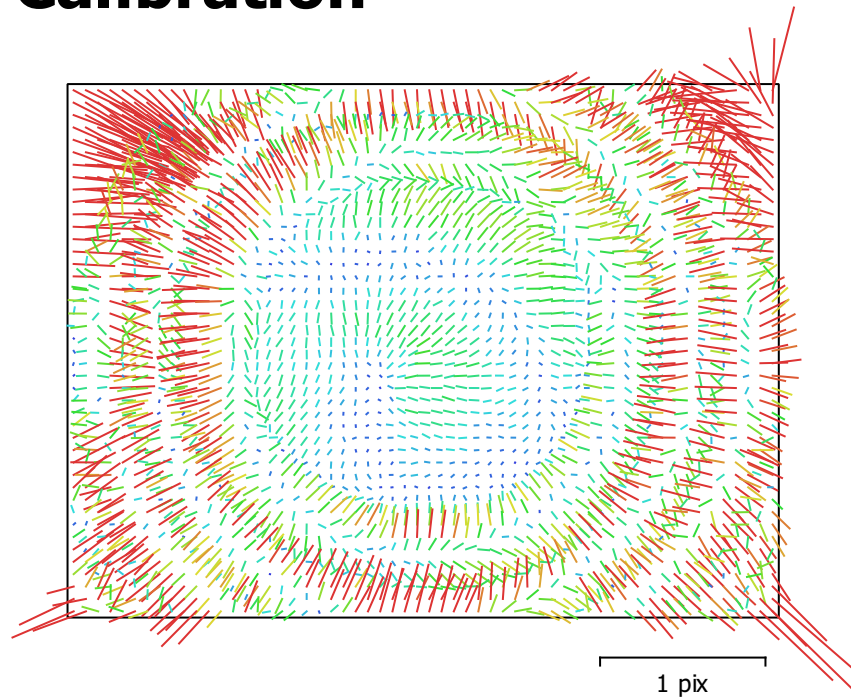

Fig. 2. Image residuals for Canon PowerShot D30 (5 mm).

## Canon PowerShot D30 (5 mm)

298 images

Type  
**Frame**

Resolution  
**4000 x 3000**

Focal Length  
**5 mm**

Pixel Size  
**1.55 x 1.55  $\mu\text{m}$**

|           | Value              | Error   | F    | Cx   | Cy    | B1    | B2    | K1    | K2    | K3    | K4    | P1    | P2    |
|-----------|--------------------|---------|------|------|-------|-------|-------|-------|-------|-------|-------|-------|-------|
| <b>F</b>  | <b>3292.85</b>     | 0.029   | 1.00 | 0.39 | -0.09 | -0.25 | 0.09  | -0.08 | 0.13  | -0.14 | 0.14  | 0.17  | -0.14 |
| <b>Cx</b> | <b>-28.2538</b>    | 0.032   |      | 1.00 | 0.03  | -0.50 | -0.14 | 0.02  | 0.03  | -0.04 | 0.04  | 0.92  | 0.01  |
| <b>Cy</b> | <b>3.39421</b>     | 0.03    |      |      | 1.00  | 0.14  | -0.46 | 0.00  | -0.01 | 0.01  | -0.00 | 0.04  | 0.95  |
| <b>B1</b> | <b>-1.48238</b>    | 0.004   |      |      |       | 1.00  | -0.01 | -0.00 | -0.02 | 0.02  | -0.02 | -0.34 | 0.13  |
| <b>B2</b> | <b>0.0530544</b>   | 0.0039  |      |      |       |       | 1.00  | 0.01  | -0.00 | 0.00  | -0.00 | -0.14 | -0.33 |
| <b>K1</b> | <b>-0.004668</b>   | 2.7e-05 |      |      |       |       |       | 1.00  | -0.97 | 0.92  | -0.87 | 0.02  | -0.01 |
| <b>K2</b> | <b>0.0444225</b>   | 0.00019 |      |      |       |       |       |       | 1.00  | -0.99 | 0.96  | 0.03  | -0.01 |
| <b>K3</b> | <b>-0.170559</b>   | 0.00051 |      |      |       |       |       |       |       | 1.00  | -0.99 | -0.03 | 0.00  |
| <b>K4</b> | <b>0.172414</b>    | 0.00048 |      |      |       |       |       |       |       |       | 1.00  | 0.04  | -0.00 |
| <b>P1</b> | <b>-0.00343529</b> | 2.1e-06 |      |      |       |       |       |       |       |       |       | 1.00  | 0.03  |
| <b>P2</b> | <b>-0.00104095</b> | 2.1e-06 |      |      |       |       |       |       |       |       |       |       | 1.00  |

Table 2. Calibration coefficients and correlation matrix.

# Ground Control Points

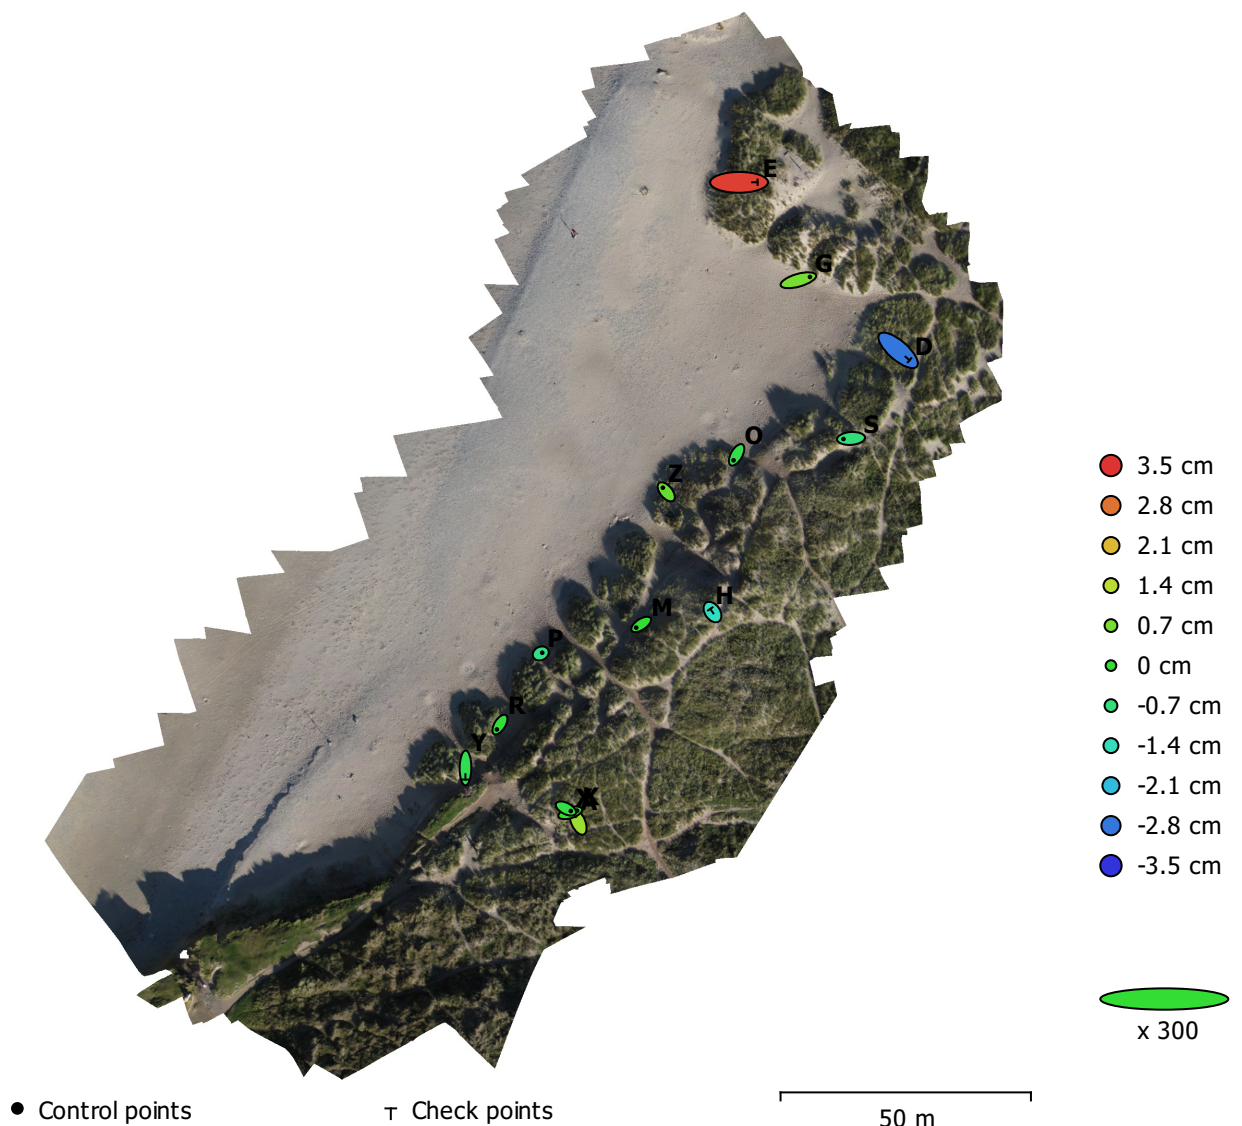

Fig. 3. GCP locations and error estimates.

Z error is represented by ellipse color. X,Y errors are represented by ellipse shape.

Estimated GCP locations are marked with a dot or crossing.

| Count | X error (cm) | Y error (cm) | Z error (cm) | XY error (cm) | Total (cm) |
|-------|--------------|--------------|--------------|---------------|------------|
| 10    | 0.759989     | 0.498983     | 0.572202     | 0.909158      | 1.07424    |

Table 3. Control points RMSE.

X - Easting, Y - Northing, Z - Altitude.

| Count | X error (cm) | Y error (cm) | Z error (cm) | XY error (cm) | Total (cm) |
|-------|--------------|--------------|--------------|---------------|------------|
| 4     | 1.45671      | 1.03598      | 2.30506      | 1.78753       | 2.91695    |

Table 4. Check points RMSE.

X - Easting, Y - Northing, Z - Altitude.

| <b>Label</b> | <b>X error (cm)</b> | <b>Y error (cm)</b> | <b>Z error (cm)</b> | <b>Total (cm)</b> | <b>Image (pix)</b> |
|--------------|---------------------|---------------------|---------------------|-------------------|--------------------|
| A            | -0.36921            | 0.816325            | 1.0617              | 1.38921           | 1.263 (15)         |
| G            | 1.54452             | 0.440257            | 0.683828            | 1.74556           | 0.652 (39)         |
| K            | 0.898336            | 0.285822            | -0.0256907          | 0.94306           | 1.166 (15)         |
| M            | -0.661162           | -0.437746           | -0.0353339          | 0.793728          | 1.201 (16)         |
| O            | -0.405125           | -0.721398           | -0.27356            | 0.871422          | 0.706 (51)         |
| P            | 0.194715            | 0.0974953           | -0.885361           | 0.911748          | 1.024 (36)         |
| R            | -0.405051           | -0.642786           | -0.102975           | 0.76671           | 0.822 (35)         |
| S            | -1.00736            | -0.072878           | -0.728787           | 1.24548           | 0.846 (26)         |
| X            | 0.653102            | -0.334027           | -0.179462           | 0.755197          | 0.866 (16)         |
| Z            | -0.449907           | 0.544366            | 0.494743            | 0.862277          | 0.600 (38)         |
| <b>Total</b> | <b>0.759989</b>     | <b>0.498983</b>     | <b>0.572202</b>     | <b>1.07424</b>    | <b>0.866</b>       |

Table 5. Control points.  
X - Easting, Y - Northing, Z - Altitude.

| <b>Label</b> | <b>X error (cm)</b> | <b>Y error (cm)</b> | <b>Z error (cm)</b> | <b>Total (cm)</b> | <b>Image (pix)</b> |
|--------------|---------------------|---------------------|---------------------|-------------------|--------------------|
| D            | 1.52118             | -1.31507            | -2.82067            | 3.46405           | 0.686 (17)         |
| E            | 2.46744             | 0.0132225           | 3.33091             | 4.14529           | 0.575 (30)         |
| H            | -0.292531           | 0.420601            | -1.44513            | 1.53326           | 0.692 (10)         |
| Y            | -0.0144473          | -1.54485            | -0.337088           | 1.58126           | 0.859 (34)         |
| <b>Total</b> | <b>1.45671</b>      | <b>1.03598</b>      | <b>2.30506</b>      | <b>2.91695</b>    | <b>0.725</b>       |

Table 6. Check points.  
X - Easting, Y - Northing, Z - Altitude.



# Digital Elevation Model

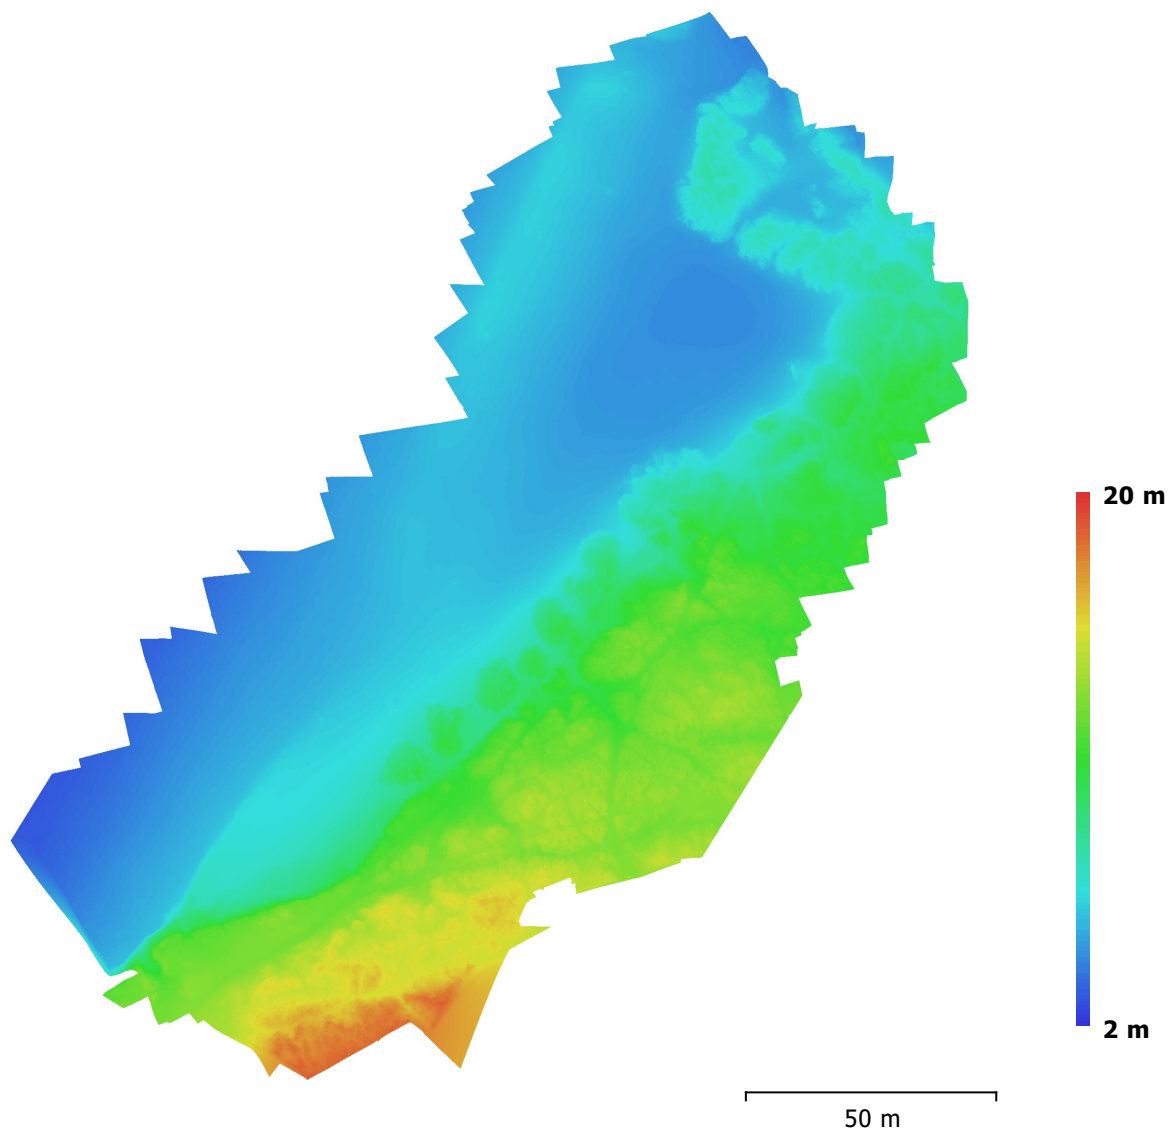

Fig. 4. Reconstructed digital elevation model.

Resolution: 1.96 cm/pix  
Point density: 26.1 points/cm<sup>2</sup>

# Processing Parameters

## General

|                   |                                                 |
|-------------------|-------------------------------------------------|
| Cameras           | 298                                             |
| Aligned cameras   | 298                                             |
| Markers           | 14                                              |
| Coordinate system | OSGB 1936 / British National Grid (EPSG::27700) |
| Rotation angles   | Yaw, Pitch, Roll                                |

## Point Cloud

|                        |                         |
|------------------------|-------------------------|
| Points                 | 1,452,172 of 1,644,555  |
| RMS reprojection error | 0.184159 (0.696765 pix) |
| Max reprojection error | 0.66681 (41.6067 pix)   |
| Mean key point size    | 3.53177 pix             |
| Effective overlap      | 6.86049                 |

### Alignment parameters

|                               |                    |
|-------------------------------|--------------------|
| Accuracy                      | High               |
| Generic preselection          | Yes                |
| Reference preselection        | Yes                |
| Key point limit               | 100,000            |
| Tie point limit               | 0                  |
| Adaptive camera model fitting | Yes                |
| Matching time                 | 7 hours 58 minutes |
| Alignment time                | 1 hours 50 minutes |

### Optimization parameters

|                     |                                  |
|---------------------|----------------------------------|
| Parameters          | f, b1, b2, cx, cy, k1-k4, p1, p2 |
| Fit rolling shutter | No                               |
| Optimization time   | 1 minutes 15 seconds             |

## Dense Point Cloud

|        |            |
|--------|------------|
| Points | 60,423,393 |
|--------|------------|

### Reconstruction parameters

|                             |                    |
|-----------------------------|--------------------|
| Quality                     | High               |
| Depth filtering             | Aggressive         |
| Depth maps generation time  | 13 hours 2 minutes |
| Dense cloud generation time | 2 hours 29 minutes |

## Model

|          |           |
|----------|-----------|
| Faces    | 3,983,909 |
| Vertices | 1,996,638 |

### Reconstruction parameters

|                 |                      |
|-----------------|----------------------|
| Surface type    | Height field         |
| Source data     | Dense                |
| Interpolation   | Enabled              |
| Quality         | High                 |
| Depth filtering | Aggressive           |
| Face count      | 4,028,221            |
| Processing time | 2 minutes 49 seconds |

## Orthomosaic

|                   |                                                 |
|-------------------|-------------------------------------------------|
| Size              | 19,554 x 21,782                                 |
| Coordinate system | OSGB 1936 / British National Grid (EPSG::27700) |
| Channels          | 3, uint8                                        |

### Reconstruction parameters

|                         |                       |
|-------------------------|-----------------------|
| Blending mode           | Mosaic                |
| Surface                 | Mesh                  |
| Enable color correction | No                    |
| Enable hole filling     | Yes                   |
| Processing time         | 28 minutes 59 seconds |

## Software

|          |                  |
|----------|------------------|
| Version  | 1.3.2 build 4205 |
| Platform | Windows 64       |
