# Supplementary material
Source: MDPI journal article supplement (https://www.mdpi.com/2072-4292/10/9/1494)
Supplement: s1 [file s1]

# **Day 7 (Survey 2)**

**Processing Report  
13 February 2018**

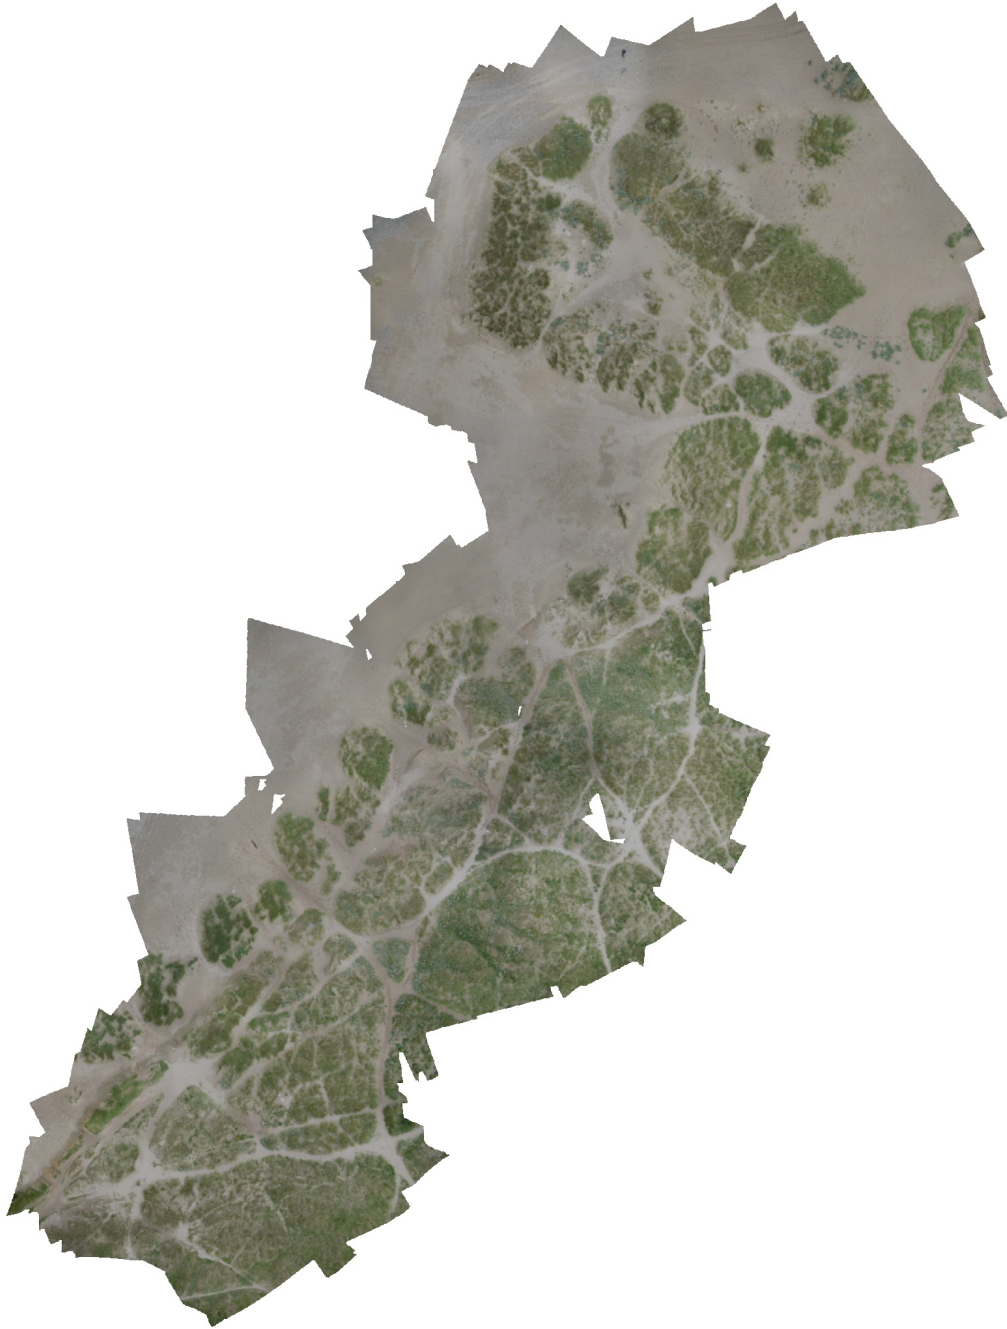

# Survey Data

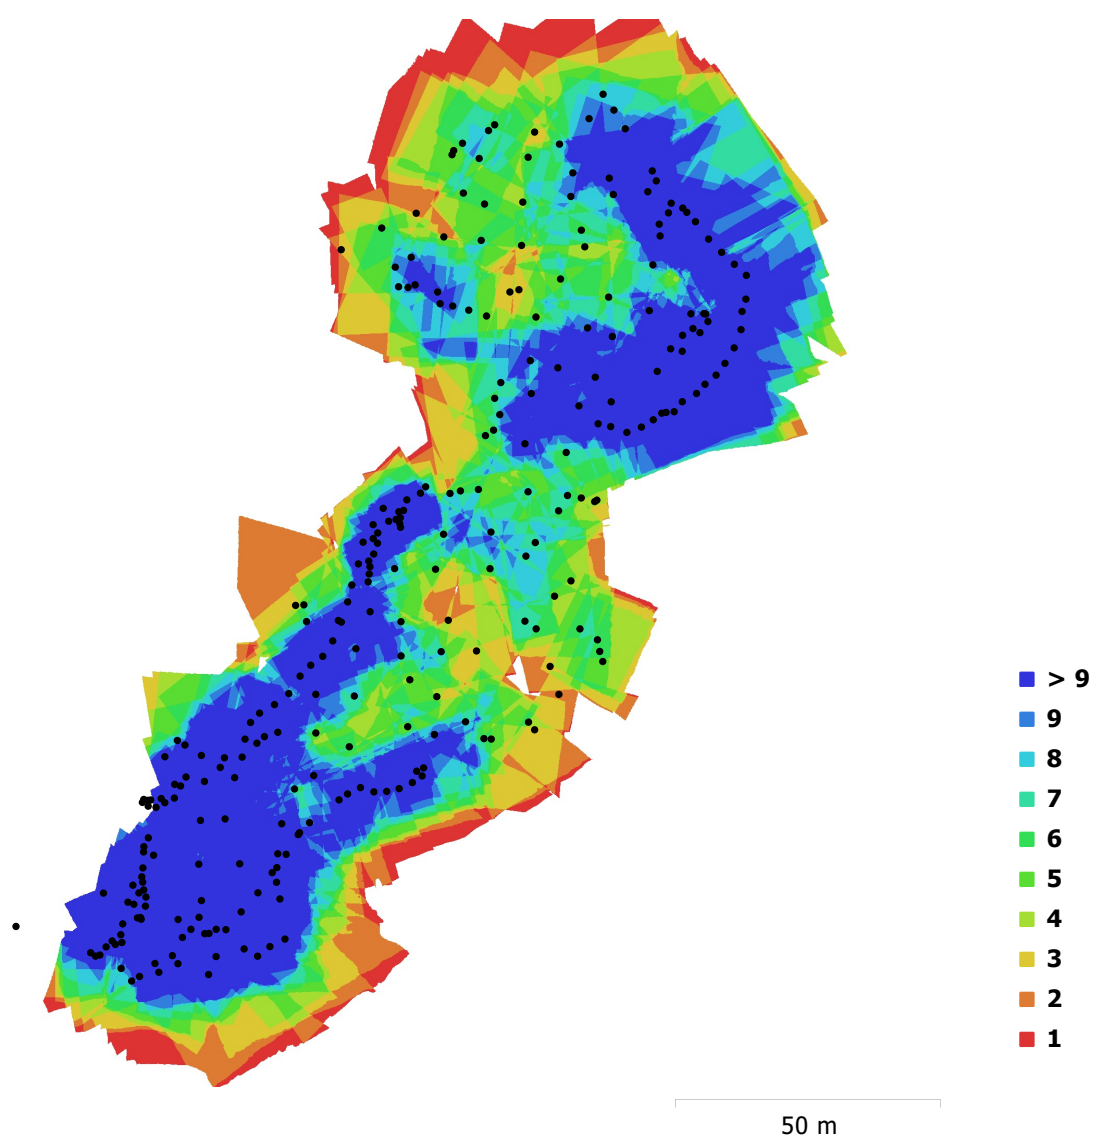

Fig. 1. Camera locations and image overlap.

|                    |                        |                     |           |
|--------------------|------------------------|---------------------|-----------|
| Number of images:  | 298                    | Camera stations:    | 287       |
| Flying altitude:   | 18.1 m                 | Tie points:         | 819,098   |
| Ground resolution: | 5.21 mm/pix            | Projections:        | 2,184,711 |
| Coverage area:     | 0.0138 km <sup>2</sup> | Reprojection error: | 0.91 pix  |

| Camera Model               | Resolution  | Focal Length | Pixel Size     | Precalibrated |
|----------------------------|-------------|--------------|----------------|---------------|
| Canon PowerShot D30 (5 mm) | 4000 x 3000 | 5 mm         | 1.55 x 1.55 µm | No            |

Table 1. Cameras.

# Camera Calibration

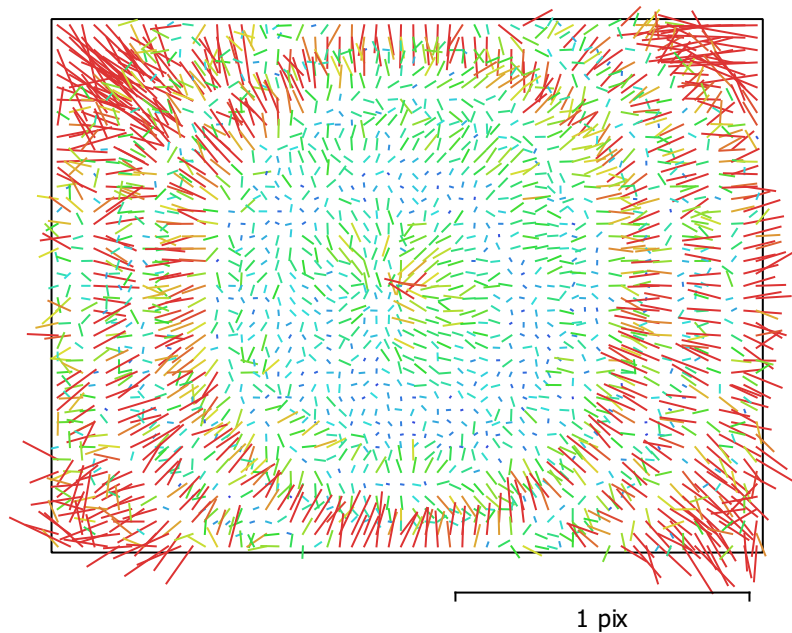

Fig. 2. Image residuals for Canon PowerShot D30 (5 mm).

## Canon PowerShot D30 (5 mm)

298 images

Type  
**Frame**

Resolution  
**4000 x 3000**

Focal Length  
**5 mm**

Pixel Size  
**1.55 x 1.55  $\mu\text{m}$**

|           | Value              | Error   | F    | Cx    | Cy    | B1    | B2    | K1    | K2    | K3    | P1    | P2    |
|-----------|--------------------|---------|------|-------|-------|-------|-------|-------|-------|-------|-------|-------|
| <b>F</b>  | <b>3291.46</b>     | 0.1     | 1.00 | -0.18 | -0.06 | 0.09  | -0.15 | 0.07  | 0.07  | -0.06 | -0.11 | 0.01  |
| <b>Cx</b> | <b>-31.9629</b>    | 0.071   |      | 1.00  | 0.03  | 0.08  | 0.14  | -0.03 | 0.00  | -0.00 | 0.81  | 0.02  |
| <b>Cy</b> | <b>1.70773</b>     | 0.067   |      |       | 1.00  | -0.17 | 0.11  | 0.01  | -0.01 | 0.01  | 0.03  | 0.80  |
| <b>B1</b> | <b>-1.38809</b>    | 0.014   |      |       |       | 1.00  | -0.04 | 0.01  | -0.03 | 0.03  | -0.05 | -0.05 |
| <b>B2</b> | <b>0.104723</b>    | 0.014   |      |       |       |       | 1.00  | 0.02  | -0.02 | 0.02  | 0.02  | -0.08 |
| <b>K1</b> | <b>0.00302047</b>  | 5.4e-05 |      |       |       |       |       | 1.00  | -0.93 | 0.87  | -0.04 | -0.01 |
| <b>K2</b> | <b>-0.0147195</b>  | 0.00023 |      |       |       |       |       |       | 1.00  | -0.98 | 0.00  | 0.00  |
| <b>K3</b> | <b>0.00591995</b>  | 0.0003  |      |       |       |       |       |       |       | 1.00  | -0.00 | 0.00  |
| <b>P1</b> | <b>-0.00374929</b> | 5.5e-06 |      |       |       |       |       |       |       |       | 1.00  | 0.01  |
| <b>P2</b> | <b>-0.0011377</b>  | 4.8e-06 |      |       |       |       |       |       |       |       |       | 1.00  |

Table 2. Calibration coefficients and correlation matrix.

# Ground Control Points

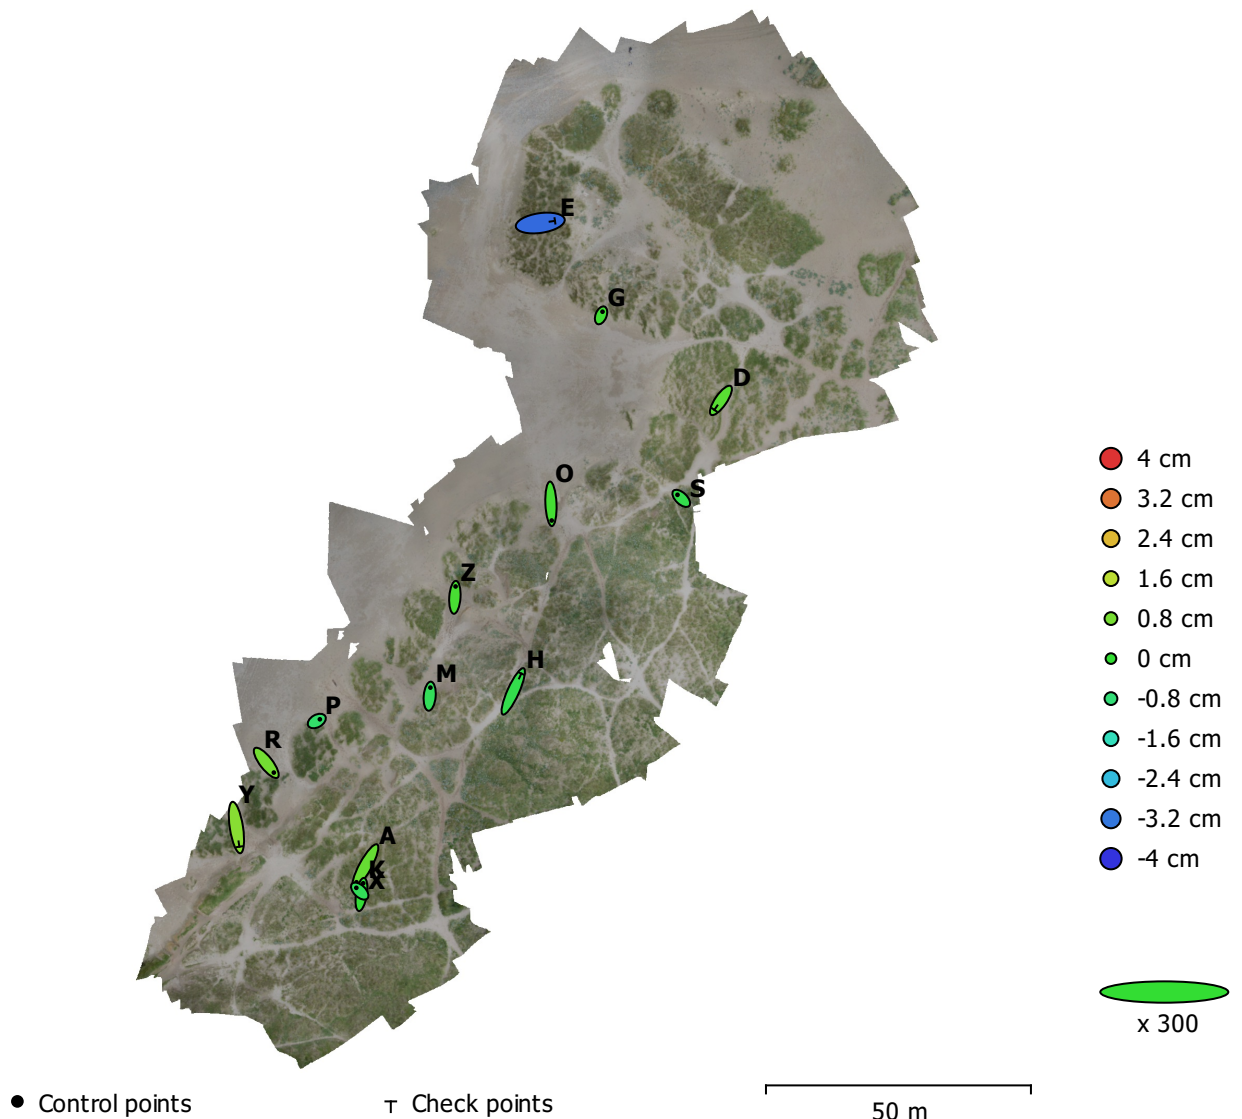

Fig. 3. GCP locations and error estimates.

Z error is represented by ellipse color. X,Y errors are represented by ellipse shape.

Estimated GCP locations are marked with a dot or crossing.

| Count | X error (cm) | Y error (cm) | Z error (cm) | XY error (cm) | Total (cm) |
|-------|--------------|--------------|--------------|---------------|------------|
| 10    | 0.530832     | 1.25371      | 0.44003      | 1.36146       | 1.4308     |

Table 3. Control points RMSE.

X - Easting, Y - Northing, Z - Altitude.

| Count | X error (cm) | Y error (cm) | Z error (cm) | XY error (cm) | Total (cm) |
|-------|--------------|--------------|--------------|---------------|------------|
| 4     | 1.14617      | 1.75806      | 1.78344      | 2.09868       | 2.75411    |

Table 4. Check points RMSE.

X - Easting, Y - Northing, Z - Altitude.

| <b>Label</b> | <b>X error (cm)</b> | <b>Y error (cm)</b> | <b>Z error (cm)</b> | <b>Total (cm)</b> | <b>Image (pix)</b> |
|--------------|---------------------|---------------------|---------------------|-------------------|--------------------|
| Z            | 0.0890405           | 1.36501             | 0.222941            | 1.38596           | 0.529 (16)         |
| M            | 0.0887304           | 1.07675             | -0.48812            | 1.18555           | 0.526 (9)          |
| P            | 0.387269            | 0.21898             | -0.671327           | 0.805363          | 0.446 (6)          |
| R            | 0.952563            | -1.22008            | 0.719306            | 1.70686           | 0.392 (11)         |
| O            | 0.0912239           | -2.10231            | 0.16655             | 2.11087           | 0.535 (8)          |
| A            | -1.11638            | -2.04337            | 0.571341            | 2.39752           | 0.882 (17)         |
| K            | 0.223874            | 1.40887             | -0.0535979          | 1.42756           | 0.613 (18)         |
| X            | -0.427673           | 0.411495            | -0.454801           | 0.747714          | 0.564 (18)         |
| G            | 0.183539            | 0.457546            | 0.112829            | 0.505733          | 0.569 (6)          |
| S            | -0.47258            | 0.447236            | -0.321873           | 0.725916          | 0.103 (4)          |
| <b>Total</b> | <b>0.530832</b>     | <b>1.25371</b>      | <b>0.44003</b>      | <b>1.4308</b>     | <b>0.594</b>       |

Table 5. Control points.  
X - Easting, Y - Northing, Z - Altitude.

| <b>Label</b> | <b>X error (cm)</b> | <b>Y error (cm)</b> | <b>Z error (cm)</b> | <b>Total (cm)</b> | <b>Image (pix)</b> |
|--------------|---------------------|---------------------|---------------------|-------------------|--------------------|
| Y            | 0.371833            | -2.41316            | 0.953075            | 2.62106           | 0.632 (21)         |
| H            | 1.01465             | 2.24576             | -0.335715           | 2.4871            | 0.542 (5)          |
| D            | -0.822169           | -1.19286            | 0.417623            | 1.50774           | 0.741 (12)         |
| E            | 1.8469              | 0.27081             | -3.39518            | 3.87448           | 0.676 (4)          |
| <b>Total</b> | <b>1.14617</b>      | <b>1.75806</b>      | <b>1.78344</b>      | <b>2.75411</b>    | <b>0.660</b>       |

Table 6. Check points.  
X - Easting, Y - Northing, Z - Altitude.

# Digital Elevation Model

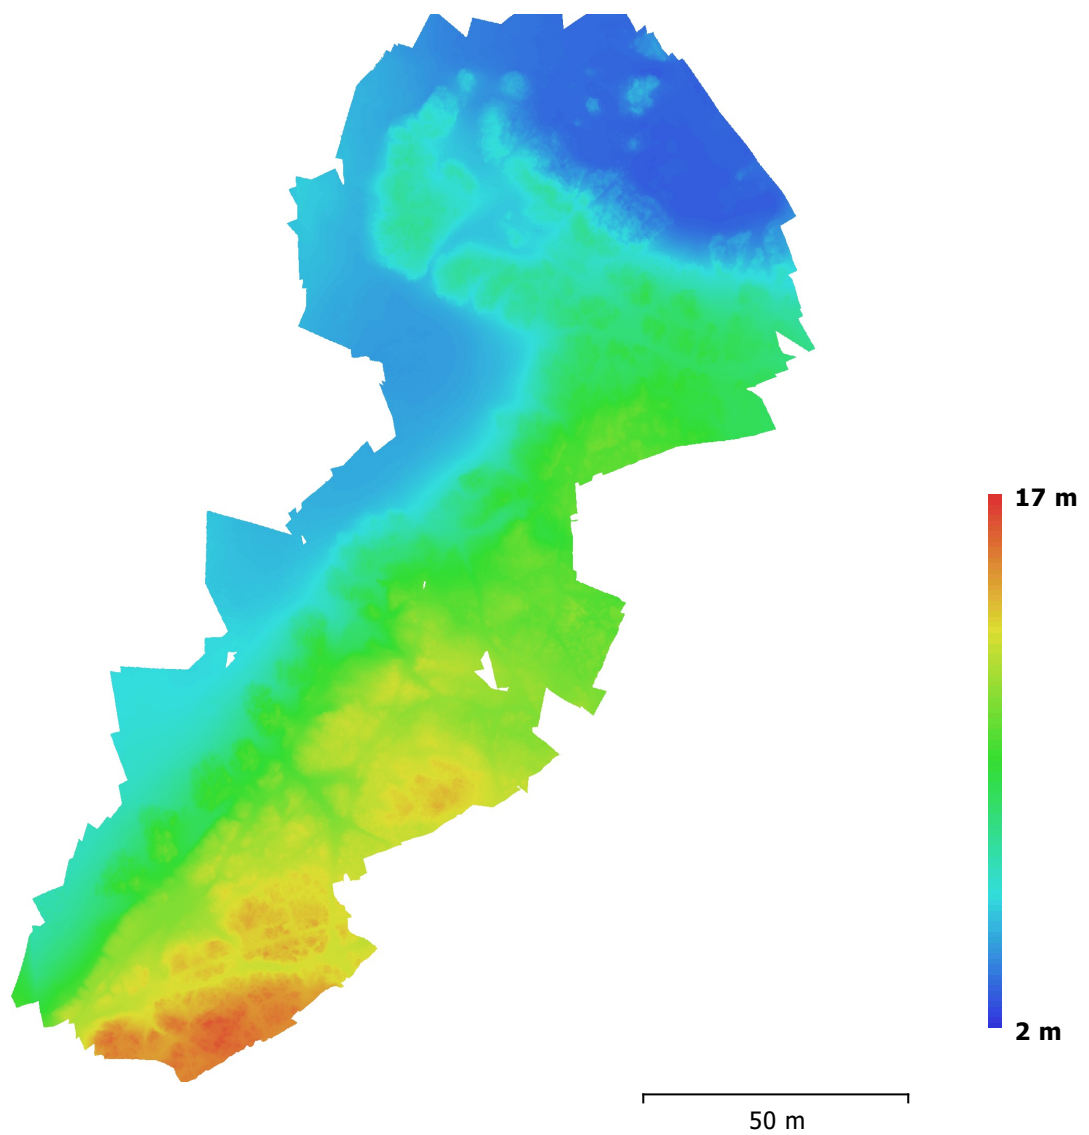

Fig. 4. Reconstructed digital elevation model.

Resolution: 1.04 cm/pix  
Point density: 92 points/cm<sup>2</sup>

# Processing Parameters

## General

|                   |                                                 |
|-------------------|-------------------------------------------------|
| Cameras           | 298                                             |
| Aligned cameras   | 287                                             |
| Markers           | 14                                              |
| Coordinate system | OSGB 1936 / British National Grid (EPSG::27700) |
| Rotation angles   | Yaw, Pitch, Roll                                |

## Point Cloud

|                        |                         |
|------------------------|-------------------------|
| Points                 | 819,098 of 916,493      |
| RMS reprojection error | 0.140989 (0.909653 pix) |
| Max reprojection error | 0.587212 (41.1404 pix)  |
| Mean key point size    | 5.95078 pix             |
| Effective overlap      | 2.75146                 |

### Alignment parameters

|                               |                      |
|-------------------------------|----------------------|
| Accuracy                      | High                 |
| Generic preselection          | Yes                  |
| Reference preselection        | Yes                  |
| Key point limit               | 100,000              |
| Tie point limit               | 0                    |
| Adaptive camera model fitting | Yes                  |
| Matching time                 | 1 hours 0 minutes    |
| Alignment time                | 8 minutes 17 seconds |

### Optimization parameters

|                     |                                  |
|---------------------|----------------------------------|
| Parameters          | f, b1, b2, cx, cy, k1-k3, p1, p2 |
| Fit rolling shutter | No                               |
| Optimization time   | 15 seconds                       |

## Dense Point Cloud

|        |             |
|--------|-------------|
| Points | 129,471,939 |
|--------|-------------|

### Reconstruction parameters

|                             |                   |
|-----------------------------|-------------------|
| Quality                     | High              |
| Depth filtering             | Aggressive        |
| Depth maps generation time  | 3 hours 9 minutes |
| Dense cloud generation time | 1 hours 1 minutes |

## Model

|          |                      |
|----------|----------------------|
| Faces    | 8,569,457            |
| Vertices | 4,292,311            |
| Texture  | 4,096 x 4,096, uint8 |

### Reconstruction parameters

|                 |                       |
|-----------------|-----------------------|
| Surface type    | Height field          |
| Source data     | Dense                 |
| Interpolation   | Enabled               |
| Quality         | High                  |
| Depth filtering | Aggressive            |
| Face count      | 8,631,462             |
| Processing time | 12 minutes 26 seconds |

### Texturing parameters

|                         |                      |
|-------------------------|----------------------|
| Mapping mode            | Orthophoto           |
| Blending mode           | Mosaic               |
| Texture size            | 4,096 x 4,096        |
| Enable color correction | No                   |
| Enable hole filling     | Yes                  |
| UV mapping time         | 2 minutes 53 seconds |
| Blending time           | 7 minutes 23 seconds |

## DEM

|                   |                                                 |
|-------------------|-------------------------------------------------|
| Size              | 24,536 x 28,941                                 |
| Coordinate system | OSGB 1936 / British National Grid (EPSG::27700) |

### Reconstruction parameters

|                                  |                                                 |
|----------------------------------|-------------------------------------------------|
| Source data                      | Dense cloud                                     |
| Interpolation                    | Enabled                                         |
| Processing time                  | 21 minutes 27 seconds                           |
| <b>Orthomosaic</b>               |                                                 |
| Size                             | 31,552 x 38,626                                 |
| Coordinate system                | OSGB 1936 / British National Grid (EPSG::27700) |
| Channels                         | 3, uint8                                        |
| <b>Reconstruction parameters</b> |                                                 |
| Blending mode                    | Mosaic                                          |
| Surface                          | Mesh                                            |
| Enable color correction          | No                                              |
| Enable hole filling              | Yes                                             |
| Processing time                  | 31 minutes 50 seconds                           |
| <b>Software</b>                  |                                                 |
| Version                          | 1.3.2 build 4205                                |
| Platform                         | Windows 64                                      |
