# Supplementary material
Source: MDPI journal article supplement (https://www.mdpi.com/2072-4292/10/9/1494)
Supplement: s1 [file s1]

# Day 10 (Survey 5)

Processing Report

13 February 2018

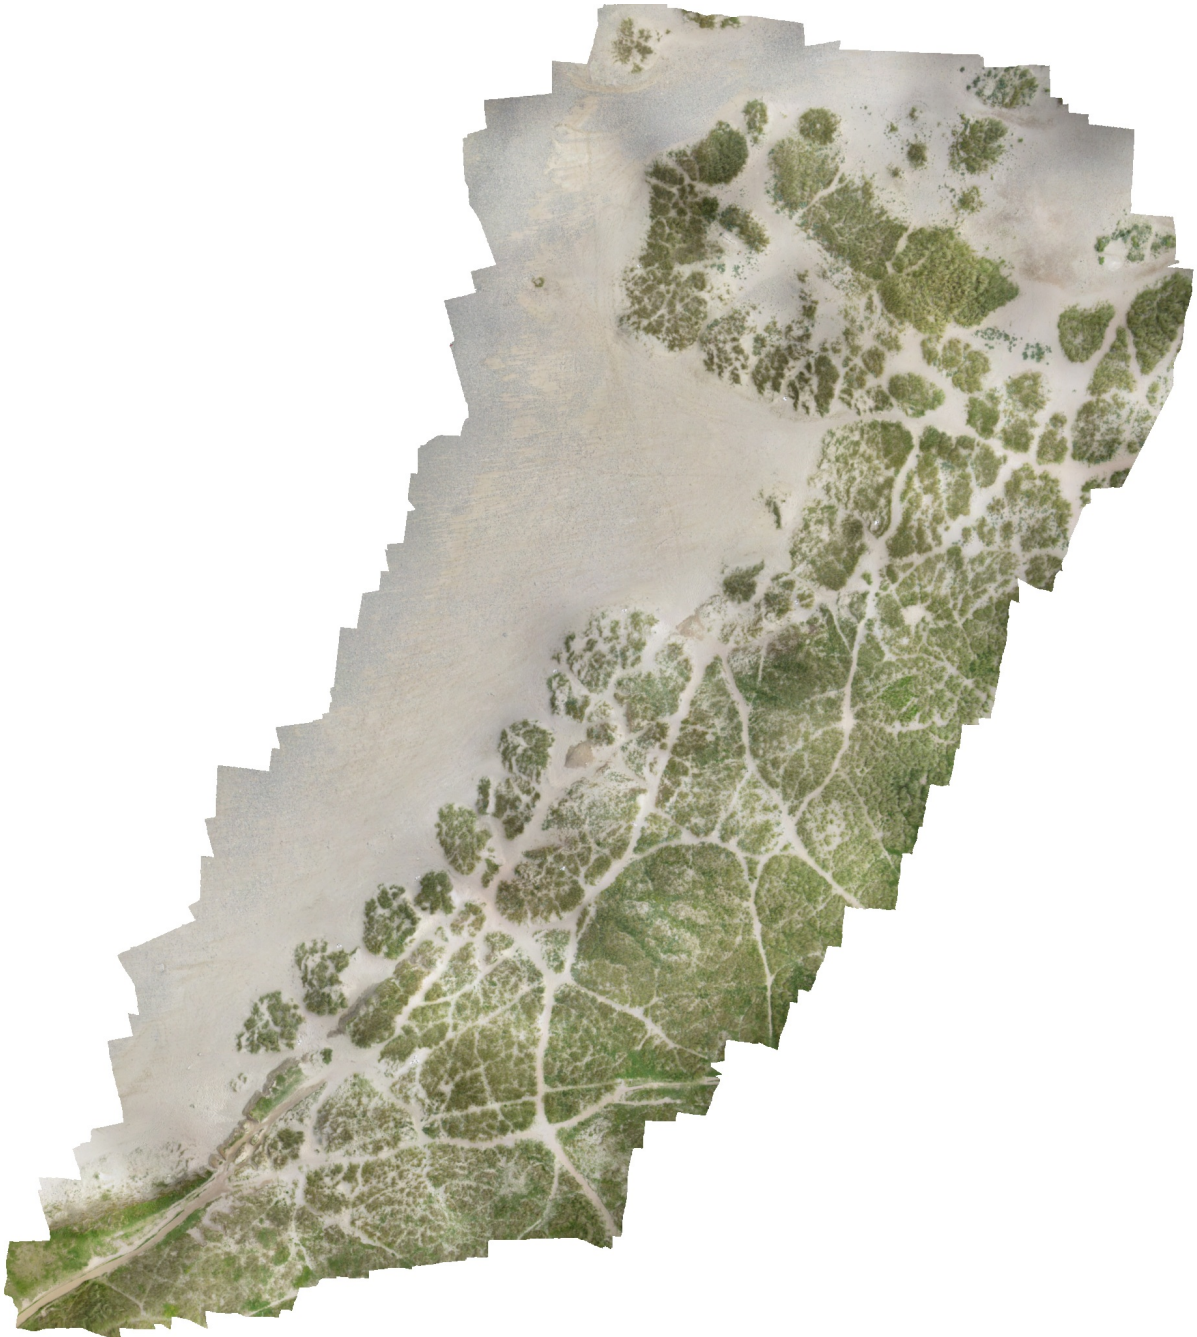

# Survey Data

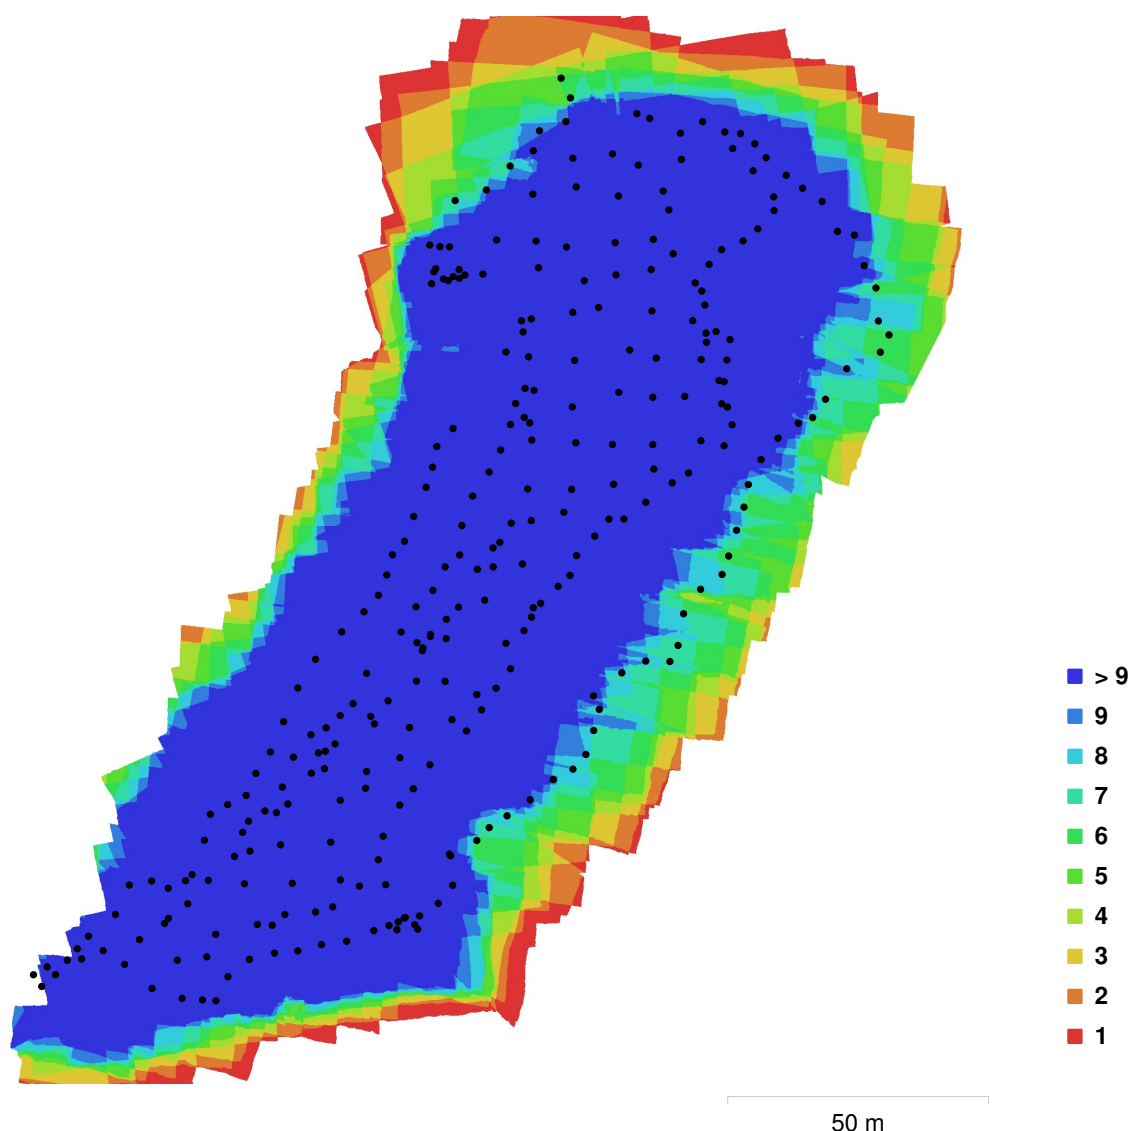

Fig. 1. Camera locations and image overlap.

|                    |             |                     |           |
|--------------------|-------------|---------------------|-----------|
| Number of images:  | 298         | Camera stations:    | 298       |
| Flying altitude:   | 30.4 m      | Tie points:         | 1,166,275 |
| Ground resolution: | 8.79 mm/pix | Projections:        | 3,931,742 |
| Coverage area:     | 0.02 km²    | Reprojection error: | 1.24 pix  |

| Camera Model               | Resolution  | Focal Length | Pixel Size     | Precalibrated |
|----------------------------|-------------|--------------|----------------|---------------|
| Canon PowerShot D30 (5 mm) | 4000 x 3000 | 5 mm         | 1.55 x 1.55 µm | No            |

Table 1. Cameras.

# Camera Calibration

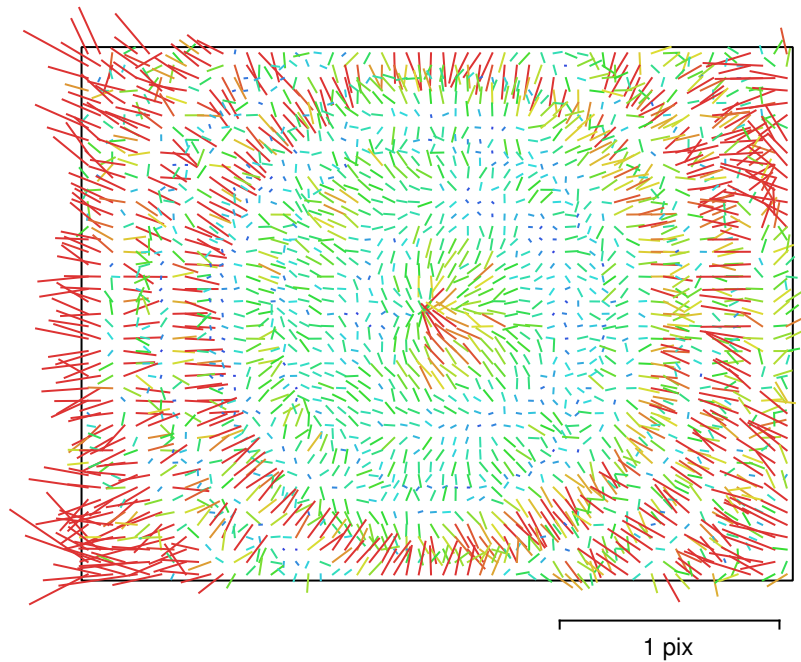

Fig. 2. Image residuals for Canon PowerShot D30 (5 mm).

## Canon PowerShot D30 (5 mm)

298 images

|       |             |              |                           |
|-------|-------------|--------------|---------------------------|
| Type  | Resolution  | Focal Length | Pixel Size                |
| Frame | 4000 x 3000 | 5 mm         | 1.55 x 1.55 $\mu\text{m}$ |

|    | Value        | Error   | F    | Cx    | Cy    | B1    | B2    | K1    | K2    | K3    | P1    | P2    |
|----|--------------|---------|------|-------|-------|-------|-------|-------|-------|-------|-------|-------|
| F  | 3276.74      | 0.092   | 1.00 | -0.15 | -0.13 | 0.02  | -0.02 | 0.03  | 0.06  | -0.05 | -0.23 | -0.08 |
| Cx | -15.4309     | 0.087   |      | 1.00  | 0.01  | -0.26 | 0.03  | -0.02 | -0.01 | 0.01  | 0.92  | 0.01  |
| Cy | -8.66948     | 0.092   |      |       | 1.00  | -0.02 | -0.32 | -0.02 | -0.00 | 0.00  | 0.01  | 0.93  |
| B1 | -0.996932    | 0.011   |      |       |       | 1.00  | -0.02 | 0.04  | -0.04 | 0.04  | -0.30 | -0.02 |
| B2 | 0.583552     | 0.01    |      |       |       |       | 1.00  | 0.01  | -0.01 | 0.00  | 0.05  | -0.36 |
| K1 | 0.00243633   | 4.2e-05 |      |       |       |       |       | 1.00  | -0.94 | 0.89  | -0.02 | -0.02 |
| K2 | -0.027078    | 0.00018 |      |       |       |       |       |       | 1.00  | -0.98 | -0.01 | -0.00 |
| K3 | 0.0235598    | 0.00023 |      |       |       |       |       |       |       | 1.00  | 0.01  | 0.00  |
| P1 | -0.00173149  | 6.2e-06 |      |       |       |       |       |       |       |       | 1.00  | 0.00  |
| P2 | -0.000270998 | 6.3e-06 |      |       |       |       |       |       |       |       |       | 1.00  |

Table 2. Calibration coefficients and correlation matrix.

# Ground Control Points

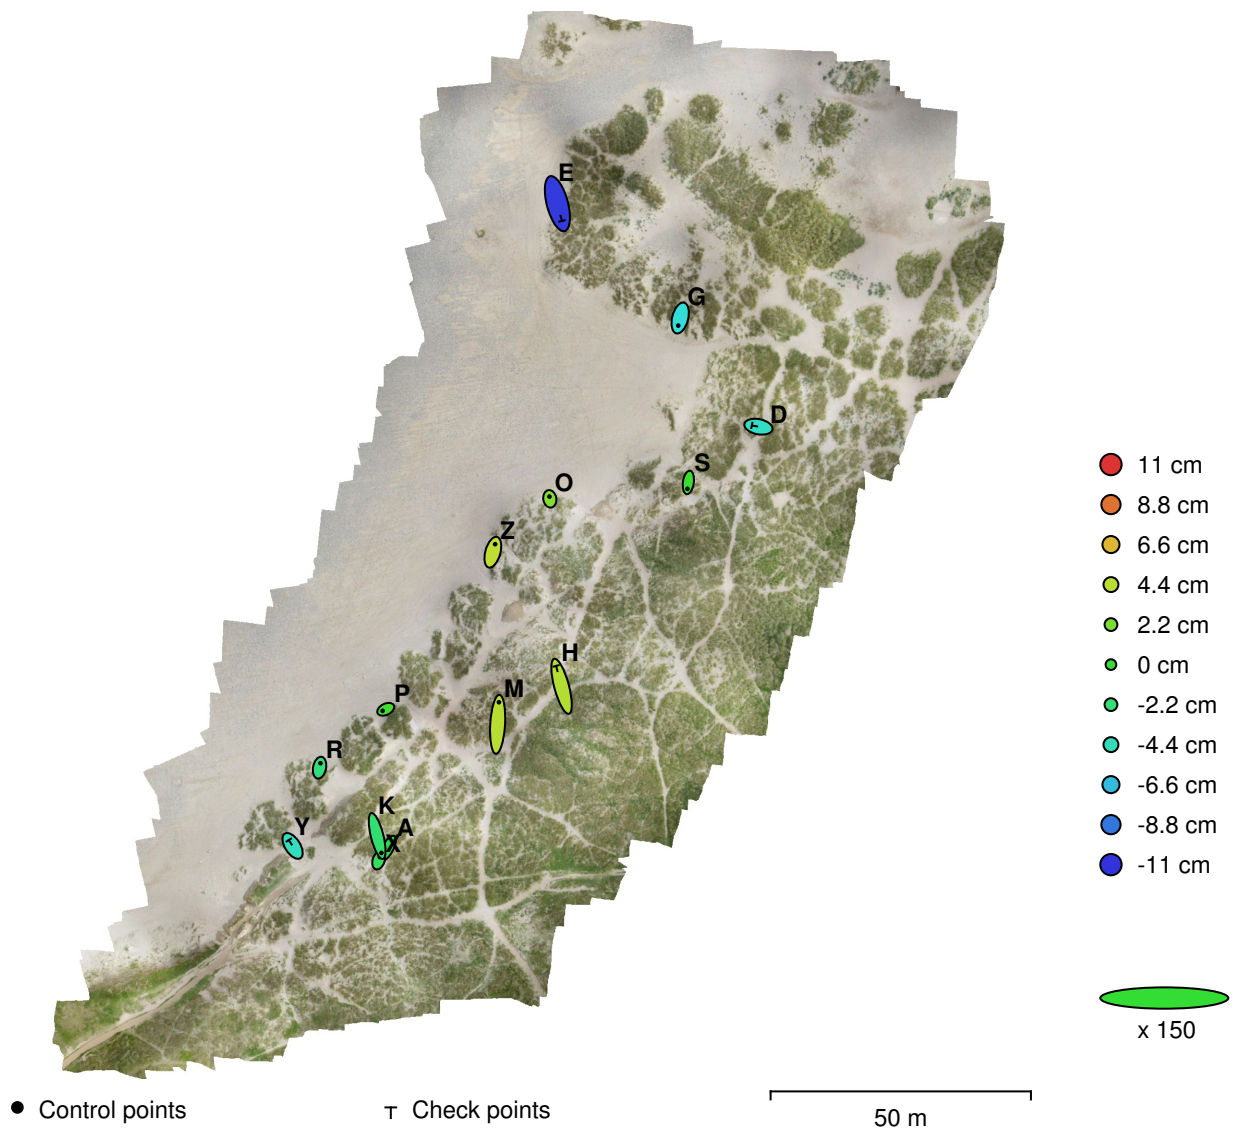

Fig. 3. GCP locations and error estimates.

Z error is represented by ellipse color. X,Y errors are represented by ellipse shape.

Estimated GCP locations are marked with a dot or crossing.

| Count | X error (cm) | Y error (cm) | Z error (cm) | XY error (cm) | Total (cm) |
|-------|--------------|--------------|--------------|---------------|------------|
| 10    | 0.620125     | 2.60326      | 2.9376       | 2.6761        | 3.97379    |

Table 3. Control points RMSE.

X - Easting, Y - Northing, Z - Altitude.

| Count | X error (cm) | Y error (cm) | Z error (cm) | XY error (cm) | Total (cm) |
|-------|--------------|--------------|--------------|---------------|------------|
| 4     | 1.33332      | 3.50651      | 6.63098      | 3.75145       | 7.61861    |

Table 4. Check points RMSE.

X - Easting, Y - Northing, Z - Altitude.

| <b>Label</b> | <b>X error (cm)</b> | <b>Y error (cm)</b> | <b>Z error (cm)</b> | <b>Total (cm)</b> | <b>Image (pix)</b> |
|--------------|---------------------|---------------------|---------------------|-------------------|--------------------|
| Z            | 0.578724            | 2.05706             | 4.47689             | 4.96074           | 0.939 (25)         |
| O            | -0.0947407          | 0.575537            | 2.48116             | 2.5488            | 0.916 (29)         |
| S            | -0.23013            | -1.62764            | 0.236824            | 1.6608            | 1.449 (22)         |
| R            | 0.223678            | 1.13781             | -2.4126             | 2.6768            | 0.862 (30)         |
| G            | -0.49421            | -1.945              | -5.46838            | 5.82499           | 1.024 (24)         |
| M            | 0.33432             | 5.6629              | 4.24731             | 7.0866            | 1.231 (25)         |
| P            | -0.788089           | -0.386959           | 0.532849            | 1.02701           | 0.902 (27)         |
| A            | -1.0725             | -1.95393            | -0.616591           | 2.31264           | 0.919 (22)         |
| X            | 0.280116            | 0.836835            | -1.38049            | 1.63845           | 0.873 (23)         |
| K            | 1.09217             | -4.32938            | -1.92529            | 4.86242           | 0.898 (22)         |
| <b>Total</b> | <b>0.620125</b>     | <b>2.60326</b>      | <b>2.9376</b>       | <b>3.97379</b>    | <b>1.009</b>       |

Table 5. Control points.  
X - Easting, Y - Northing, Z - Altitude.

| <b>Label</b> | <b>X error (cm)</b> | <b>Y error (cm)</b> | <b>Z error (cm)</b> | <b>Total (cm)</b> | <b>Image (pix)</b> |
|--------------|---------------------|---------------------|---------------------|-------------------|--------------------|
| E            | 1.17514             | -4.41802            | -10.7705            | 11.7006           | 1.186 (18)         |
| D            | -1.68041            | 0.33325             | -4.68066            | 4.98432           | 1.029 (21)         |
| Y            | -0.968789           | 1.50093             | -4.58784            | 4.92337           | 1.042 (26)         |
| H            | -1.40276            | 5.22491             | 4.11322             | 6.79603           | 1.904 (17)         |
| <b>Total</b> | <b>1.33332</b>      | <b>3.50651</b>      | <b>6.63098</b>      | <b>7.61861</b>    | <b>1.294</b>       |

Table 6. Check points.  
X - Easting, Y - Northing, Z - Altitude.



# Digital Elevation Model

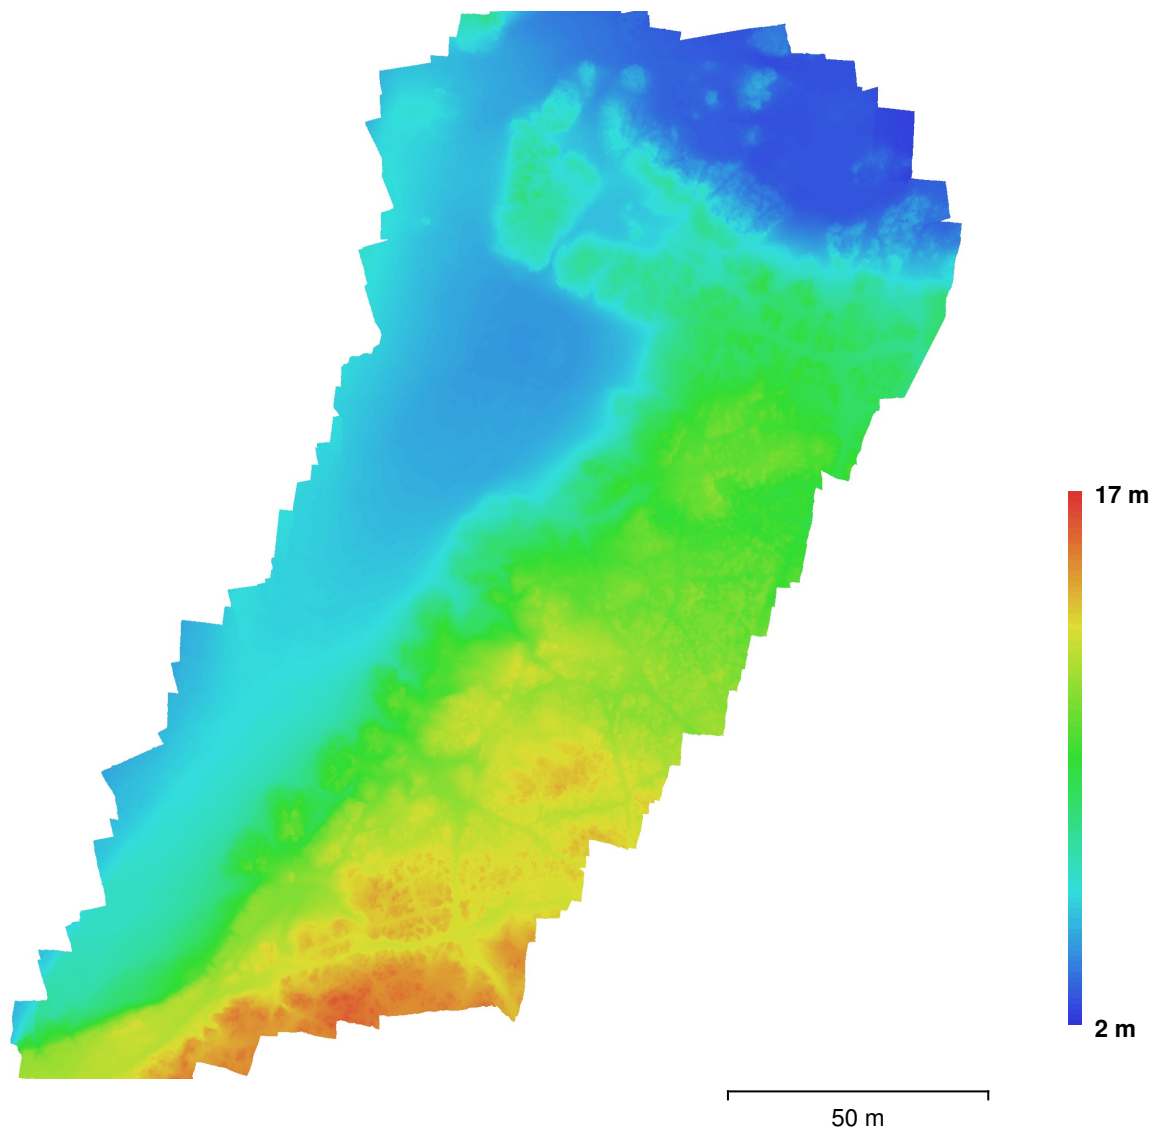

Fig. 4. Reconstructed digital elevation model.

Resolution: 1.76 cm/pix  
Point density: 32.3 points/cm<sup>2</sup>

# Processing Parameters

## General

|                   |                                                 |
|-------------------|-------------------------------------------------|
| Cameras           | 298                                             |
| Aligned cameras   | 298                                             |
| Markers           | 14                                              |
| Coordinate system | OSGB 1936 / British National Grid (EPSG::27700) |
| Rotation angles   | Yaw, Pitch, Roll                                |

## Point Cloud

|                        |                        |
|------------------------|------------------------|
| Points                 | 1,166,275 of 1,242,920 |
| RMS reprojection error | 0.214948 (1.23753 pix) |
| Max reprojection error | 0.764277 (41.2374 pix) |
| Mean key point size    | 5.55455 pix            |
| Effective overlap      | 3.62198                |

### Alignment parameters

|                               |                       |
|-------------------------------|-----------------------|
| Accuracy                      | High                  |
| Generic preselection          | Yes                   |
| Key point limit               | 100,000               |
| Tie point limit               | 0                     |
| Adaptive camera model fitting | Yes                   |
| Matching time                 | 1 hours 20 minutes    |
| Alignment time                | 11 minutes 45 seconds |

### Optimization parameters

|                     |                                  |
|---------------------|----------------------------------|
| Parameters          | f, b1, b2, cx, cy, k1-k3, p1, p2 |
| Fit rolling shutter | No                               |
| Optimization time   | 44 seconds                       |

## Depth Maps

|       |     |
|-------|-----|
| Count | 298 |
|-------|-----|

### Reconstruction parameters

|                 |                     |
|-----------------|---------------------|
| Quality         | High                |
| Filtering mode  | Aggressive          |
| Processing time | 13 hours 13 minutes |

## Dense Point Cloud

|        |            |
|--------|------------|
| Points | 84,385,355 |
|--------|------------|

### Reconstruction parameters

|                             |                     |
|-----------------------------|---------------------|
| Quality                     | High                |
| Depth filtering             | Aggressive          |
| Depth maps generation time  | 13 hours 13 minutes |
| Dense cloud generation time | 2 hours 50 minutes  |

## Model

|          |            |
|----------|------------|
| Faces    | 16,744,417 |
| Vertices | 8,380,179  |

### Reconstruction parameters

|                 |                      |
|-----------------|----------------------|
| Surface type    | Height field         |
| Source data     | Dense                |
| Interpolation   | Enabled              |
| Quality         | High                 |
| Depth filtering | Aggressive           |
| Face count      | 16,877,068           |
| Processing time | 6 minutes 33 seconds |

## DEM

|                   |                                                 |
|-------------------|-------------------------------------------------|
| Size              | 14,699 x 17,680                                 |
| Coordinate system | OSGB 1936 / British National Grid (EPSG::27700) |

### Reconstruction parameters

|                 |                      |
|-----------------|----------------------|
| Source data     | Dense cloud          |
| Interpolation   | Enabled              |
| Processing time | 7 minutes 54 seconds |

## Orthomosaic



|                                  |                                                 |
|----------------------------------|-------------------------------------------------|
| Size                             | 22,500 x 23,302                                 |
| Coordinate system                | OSGB 1936 / British National Grid (EPSG::27700) |
| Channels                         | 3, uint8                                        |
| <b>Reconstruction parameters</b> |                                                 |
| Blending mode                    | Mosaic                                          |
| Surface                          | DEM                                             |
| Enable color correction          | No                                              |
| Enable hole filling              | Yes                                             |
| Processing time                  | 6 minutes 34 seconds                            |
| <b>Software</b>                  |                                                 |
| Version                          | 1.3.2 build 4205                                |
| Platform                         | Linux 64                                        |
