# Supplementary material
Source: MDPI journal article supplement (https://www.mdpi.com/2072-4292/10/9/1494)
Supplement: s1 [file s1]

# **Day 11 (Survey 6)**

**Processing Report  
13 February 2018**

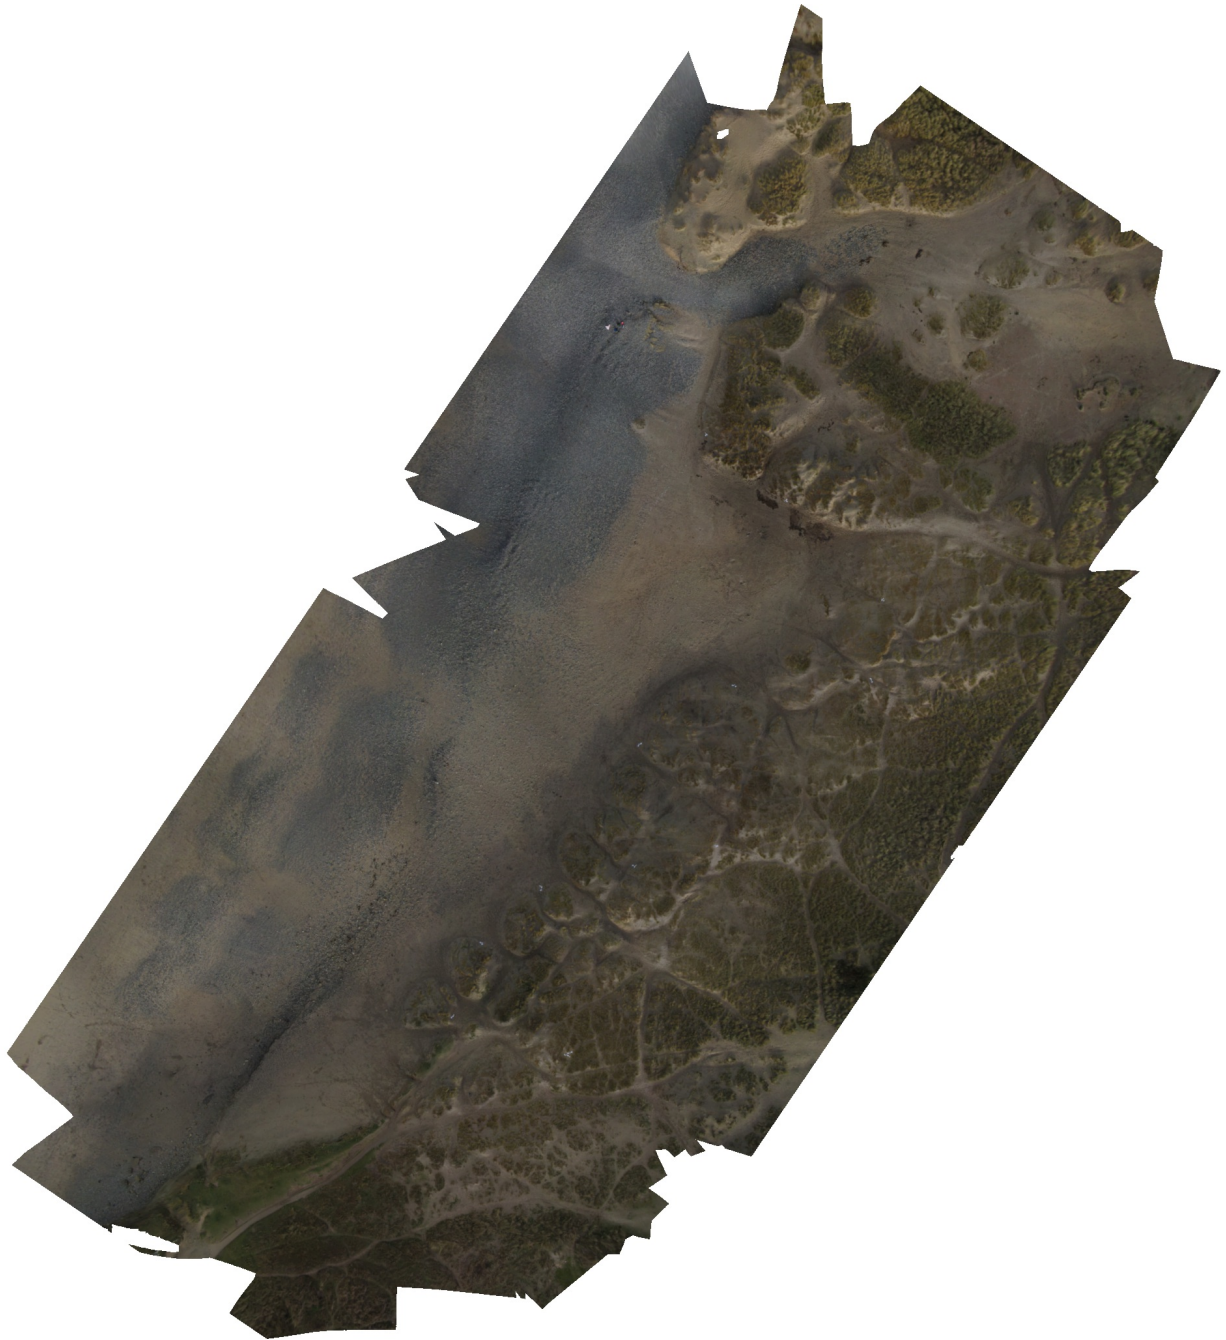

# Survey Data

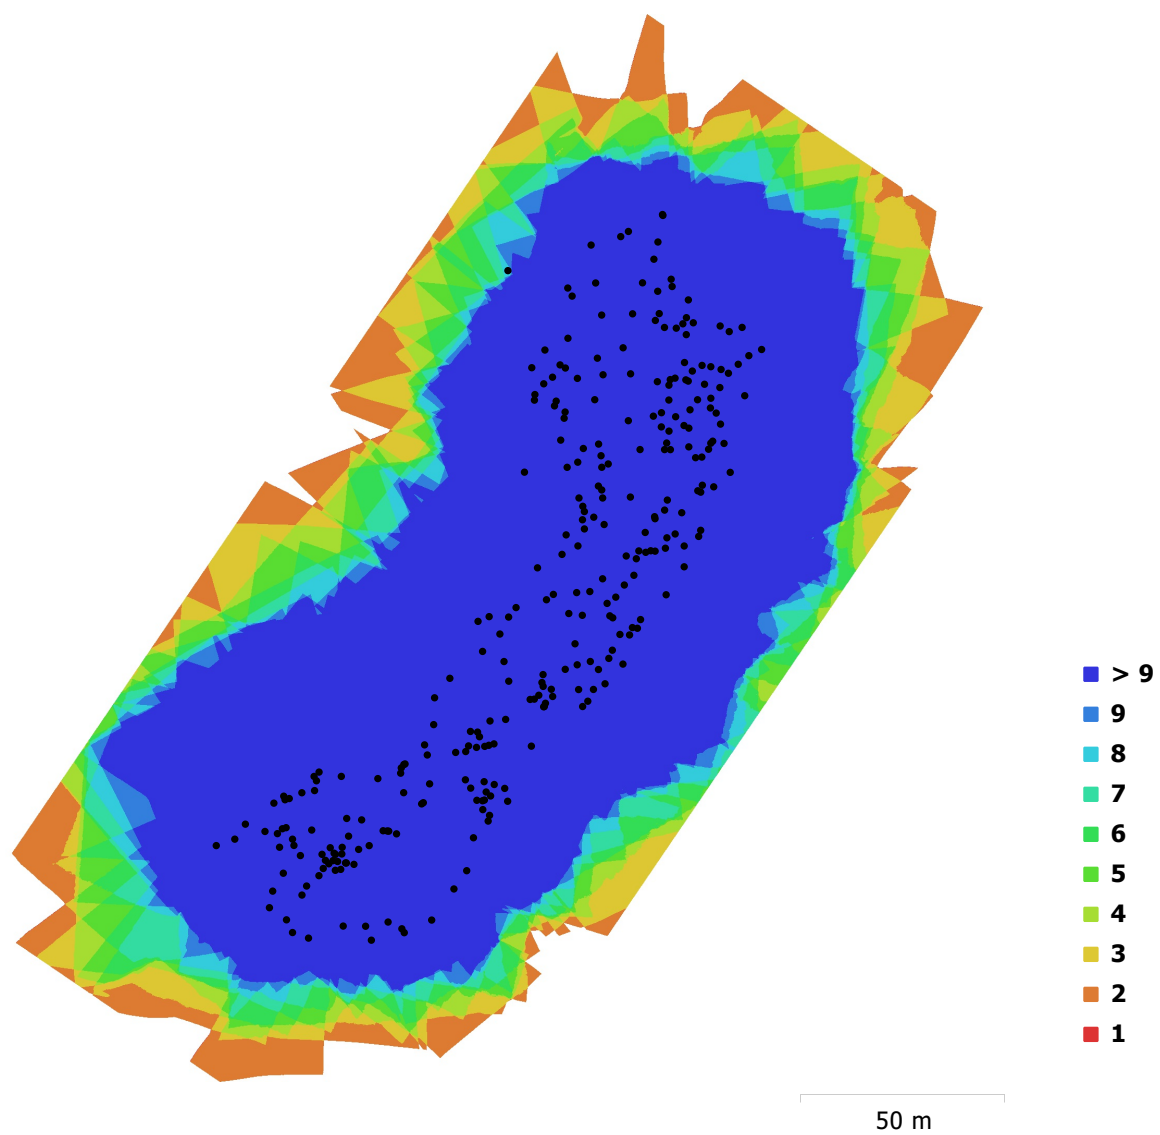

Fig. 1. Camera locations and image overlap.

|                    |                        |                     |           |
|--------------------|------------------------|---------------------|-----------|
| Number of images:  | 298                    | Camera stations:    | 298       |
| Flying altitude:   | 42.9 m                 | Tie points:         | 1,218,213 |
| Ground resolution: | 1.26 cm/pix            | Projections:        | 4,514,338 |
| Coverage area:     | 0.0324 km <sup>2</sup> | Reprojection error: | 1.15 pix  |

| Camera Model               | Resolution  | Focal Length | Pixel Size     | Precalibrated |
|----------------------------|-------------|--------------|----------------|---------------|
| Canon PowerShot D30 (5 mm) | 4000 x 3000 | 5 mm         | 1.55 x 1.55 μm | No            |

Table 1. Cameras.

# Camera Calibration

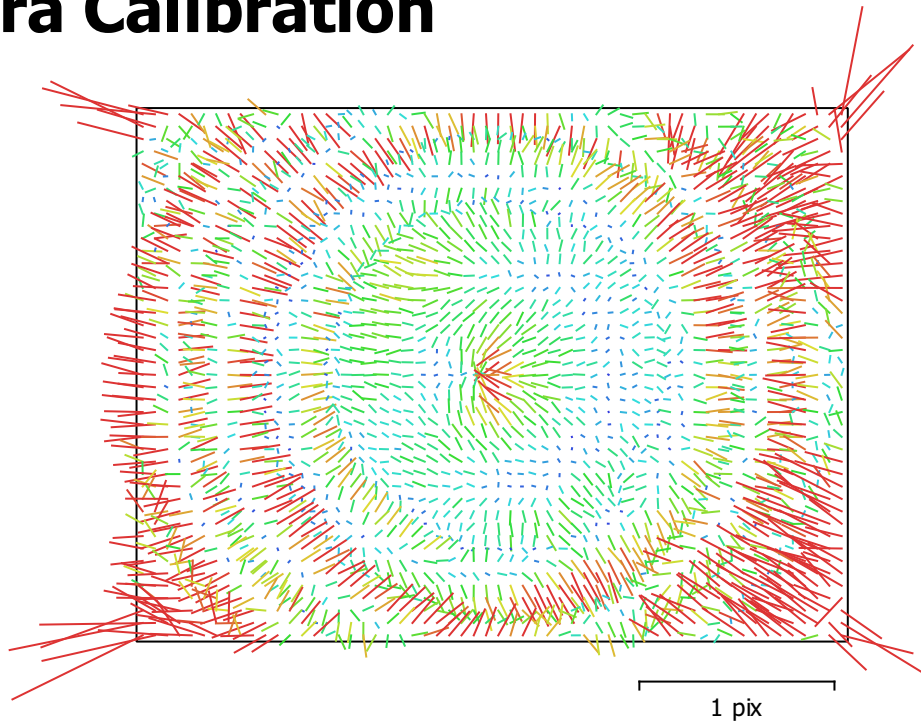

Fig. 2. Image residuals for Canon PowerShot D30 (5 mm).

## Canon PowerShot D30 (5 mm)

298 images

Type  
Frame

Resolution  
**4000 x 3000**

Focal Length  
**5 mm**

Pixel Size  
**1.55 x 1.55  $\mu\text{m}$**

|           | Value               | Error   | F    | Cx    | Cy    | B1    | B2    | K1    | K2    | K3    | K4    | P1    | P2    |
|-----------|---------------------|---------|------|-------|-------|-------|-------|-------|-------|-------|-------|-------|-------|
| <b>F</b>  | <b>3280.17</b>      | 0.052   | 1.00 | -0.41 | 0.11  | -0.33 | -0.06 | -0.10 | 0.14  | -0.14 | 0.13  | -0.16 | 0.11  |
| <b>Cx</b> | <b>-18.2098</b>     | 0.05    |      | 1.00  | -0.07 | 0.49  | 0.03  | -0.04 | 0.01  | -0.00 | 0.00  | 0.89  | -0.08 |
| <b>Cy</b> | <b>-6.95172</b>     | 0.045   |      |       | 1.00  | -0.04 | 0.34  | 0.02  | -0.01 | 0.00  | -0.00 | -0.02 | 0.93  |
| <b>B1</b> | <b>-0.940386</b>    | 0.0055  |      |       |       | 1.00  | 0.02  | -0.01 | -0.01 | 0.00  | -0.00 | 0.26  | -0.06 |
| <b>B2</b> | <b>0.398266</b>     | 0.0052  |      |       |       |       | 1.00  | 0.00  | 0.00  | 0.00  | -0.00 | 0.04  | 0.16  |
| <b>K1</b> | <b>-0.00255726</b>  | 6.5e-05 |      |       |       |       |       | 1.00  | -0.97 | 0.92  | -0.87 | -0.05 | 0.02  |
| <b>K2</b> | <b>0.0179736</b>    | 0.00048 |      |       |       |       |       |       | 1.00  | -0.99 | 0.95  | 0.01  | -0.01 |
| <b>K3</b> | <b>-0.137336</b>    | 0.0014  |      |       |       |       |       |       |       | 1.00  | -0.99 | -0.00 | 0.01  |
| <b>K4</b> | <b>0.173831</b>     | 0.0014  |      |       |       |       |       |       |       |       | 1.00  | 0.00  | -0.00 |
| <b>P1</b> | <b>-0.00194867</b>  | 3.5e-06 |      |       |       |       |       |       |       |       |       | 1.00  | -0.04 |
| <b>P2</b> | <b>-1.86849e-06</b> | 3.3e-06 |      |       |       |       |       |       |       |       |       |       | 1.00  |

Table 2. Calibration coefficients and correlation matrix.

# Ground Control Points

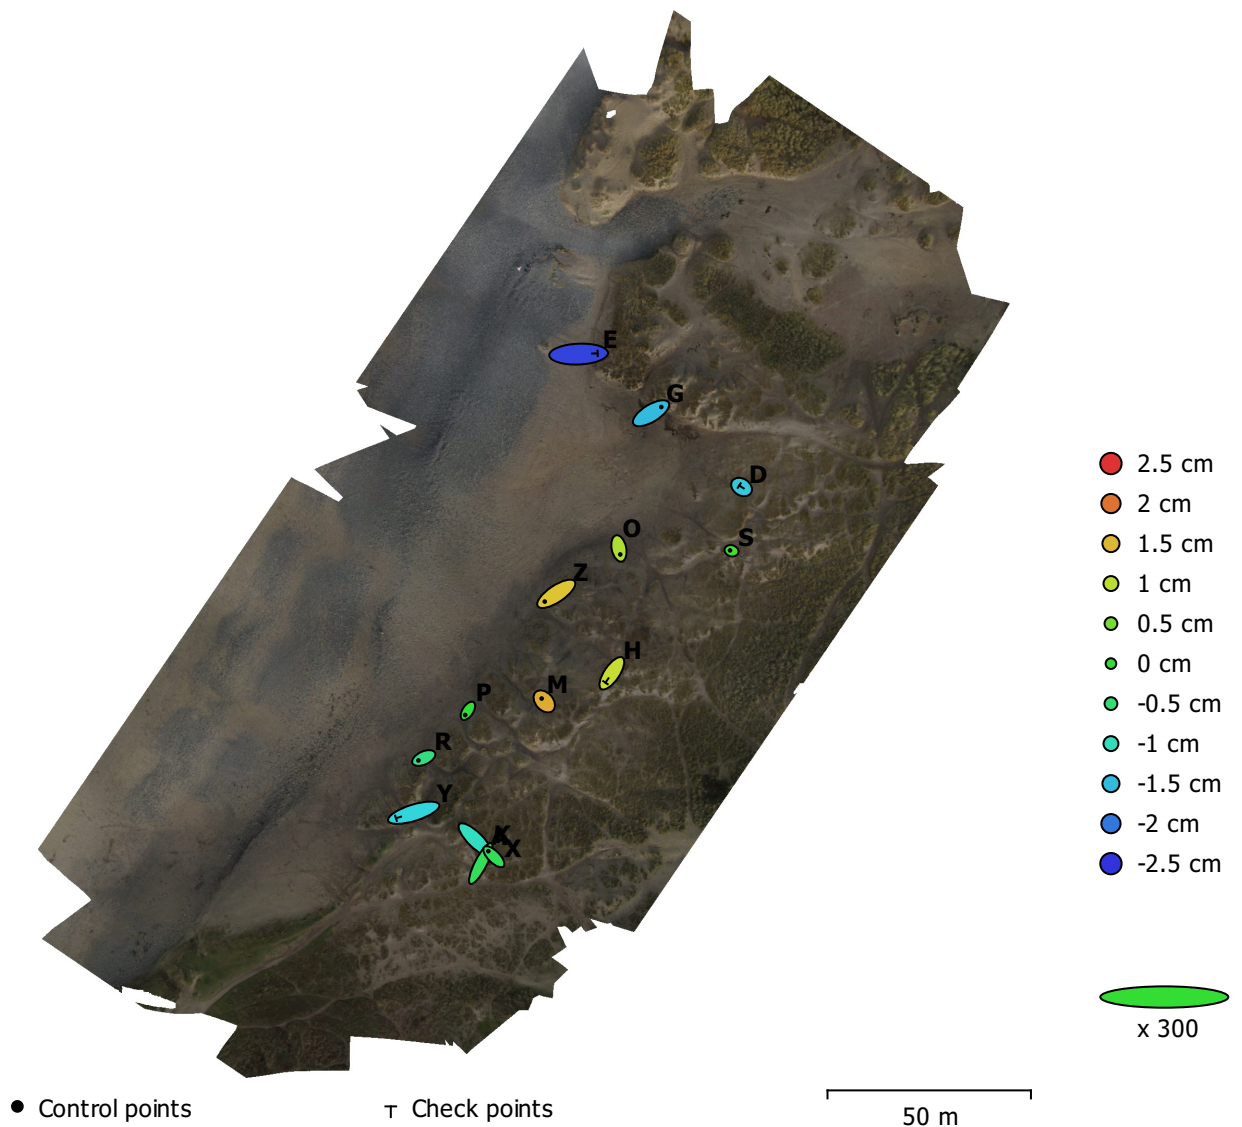

Fig. 3. GCP locations and error estimates.

Z error is represented by ellipse color. X,Y errors are represented by ellipse shape.

Estimated GCP locations are marked with a dot or crossing.

| Count | X error (cm) | Y error (cm) | Z error (cm) | XY error (cm) | Total (cm) |
|-------|--------------|--------------|--------------|---------------|------------|
| 10    | 1.14238      | 1.19191      | 0.966502     | 1.65096       | 1.91306    |

Table 3. Control points RMSE.

X - Easting, Y - Northing, Z - Altitude.

| Count | X error (cm) | Y error (cm) | Z error (cm) | XY error (cm) | Total (cm) |
|-------|--------------|--------------|--------------|---------------|------------|
| 4     | 2.1998       | 0.901373     | 1.62794      | 2.37731       | 2.88128    |

Table 4. Check points RMSE.

X - Easting, Y - Northing, Z - Altitude.

| <b>Label</b> | <b>X error (cm)</b> | <b>Y error (cm)</b> | <b>Z error (cm)</b> | <b>Total (cm)</b> | <b>Image (pix)</b> |
|--------------|---------------------|---------------------|---------------------|-------------------|--------------------|
| A            | 1.71783             | -1.69026            | -1.03774            | 2.62389           | 1.014 (25)         |
| G            | 1.67708             | 1.02382             | -1.52479            | 2.48713           | 0.918 (49)         |
| K            | 1.27052             | 2.46023             | -0.304412           | 2.78561           | 1.104 (23)         |
| M            | -0.430292           | 0.471066            | 1.61898             | 1.74016           | 1.249 (30)         |
| O            | 0.212763            | -0.988092           | 0.901675            | 1.35448           | 0.958 (44)         |
| P            | -0.441874           | -0.681316           | -0.0429745          | 0.813198          | 0.957 (40)         |
| R            | -0.878742           | -0.399331           | -0.573623           | 1.12281           | 0.803 (29)         |
| S            | -0.252691           | 0.0699665           | 0.109829            | 0.284272          | 0.974 (34)         |
| X            | -0.909347           | 0.907262            | -0.268237           | 1.31225           | 1.068 (23)         |
| Z            | -1.89315            | -1.26434            | 1.41339             | 2.6796            | 0.816 (33)         |
| <b>Total</b> | <b>1.14238</b>      | <b>1.19191</b>      | <b>0.966502</b>     | <b>1.91306</b>    | <b>0.982</b>       |

Table 5. Control points.  
X - Easting, Y - Northing, Z - Altitude.

| <b>Label</b> | <b>X error (cm)</b> | <b>Y error (cm)</b> | <b>Z error (cm)</b> | <b>Total (cm)</b> | <b>Image (pix)</b> |
|--------------|---------------------|---------------------|---------------------|-------------------|--------------------|
| D            | -0.385398           | 0.243911            | -1.41884            | 1.49035           | 0.936 (48)         |
| E            | 3.10685             | 0.127864            | -2.37568            | 3.91315           | 0.914 (37)         |
| H            | -1.04566            | -1.53513            | 1.08229             | 2.14974           | 0.830 (39)         |
| Y            | -2.90895            | -0.904114           | -1.33131            | 3.32443           | 1.063 (46)         |
| <b>Total</b> | <b>2.1998</b>       | <b>0.901373</b>     | <b>1.62794</b>      | <b>2.88128</b>    | <b>0.945</b>       |

Table 6. Check points.  
X - Easting, Y - Northing, Z - Altitude.



# Digital Elevation Model

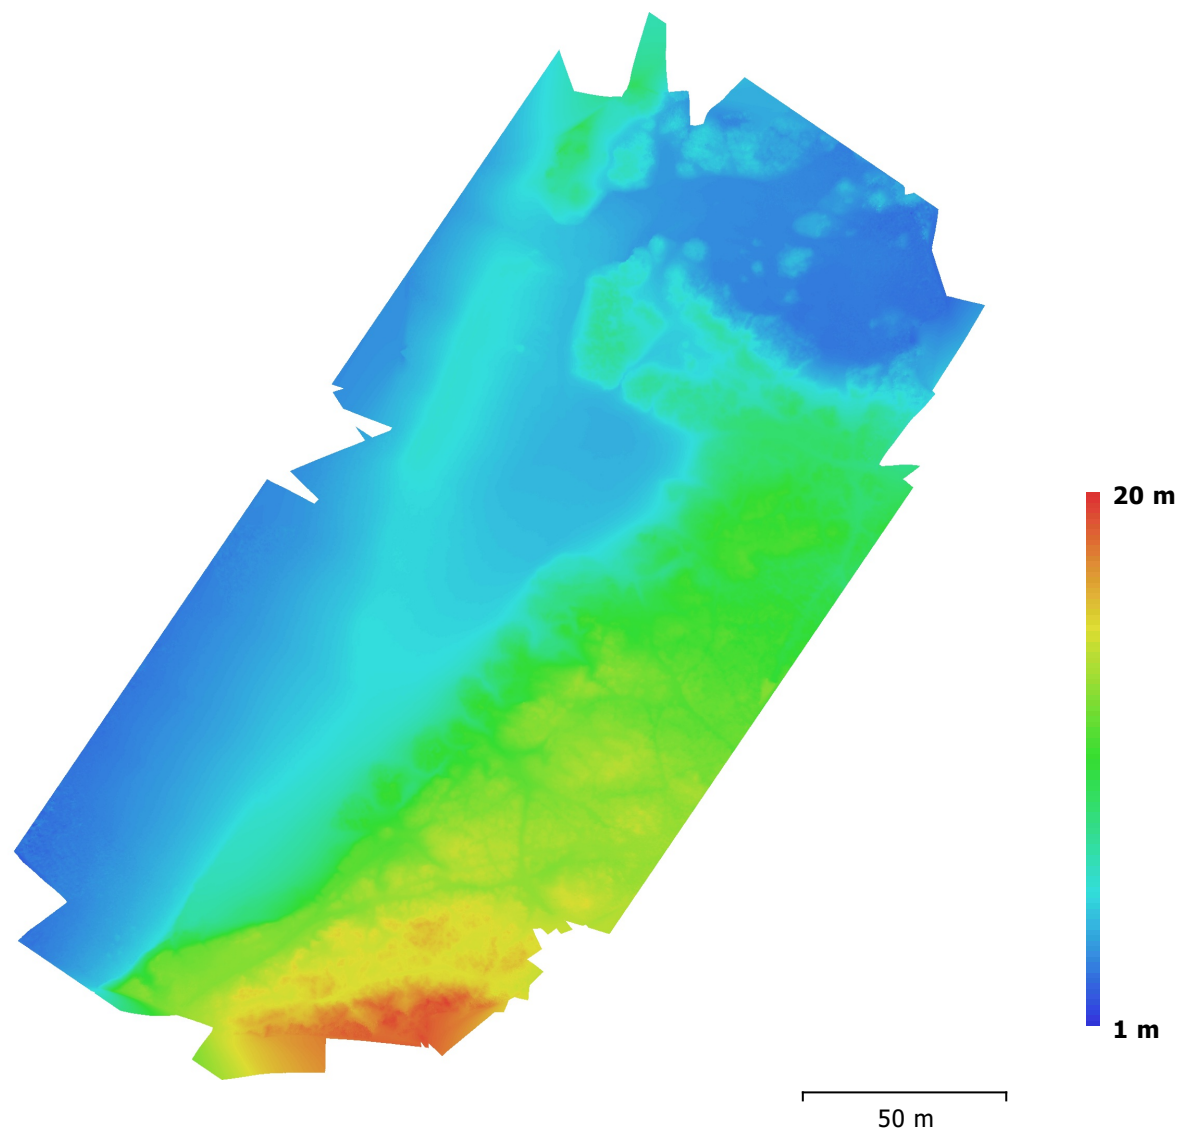

Fig. 4. Reconstructed digital elevation model.

Resolution: 2.52 cm/pix  
Point density: 15.7 points/cm<sup>2</sup>

# Processing Parameters

## General

|                   |                                                 |
|-------------------|-------------------------------------------------|
| Cameras           | 298                                             |
| Aligned cameras   | 298                                             |
| Markers           | 14                                              |
| Coordinate system | OSGB 1936 / British National Grid (EPSG::27700) |
| Rotation angles   | Yaw, Pitch, Roll                                |

## Point Cloud

|                        |                        |
|------------------------|------------------------|
| Points                 | 1,218,213 of 1,301,800 |
| RMS reprojection error | 0.21012 (1.14538 pix)  |
| Max reprojection error | 0.759971 (59.6604 pix) |
| Mean key point size    | 4.94085 pix            |
| Effective overlap      | 4.16971                |

### Alignment parameters

|                               |                       |
|-------------------------------|-----------------------|
| Accuracy                      | High                  |
| Generic preselection          | Yes                   |
| Reference preselection        | Yes                   |
| Key point limit               | 100,000               |
| Tie point limit               | 0                     |
| Adaptive camera model fitting | Yes                   |
| Matching time                 | 2 hours 7 minutes     |
| Alignment time                | 11 minutes 50 seconds |

### Optimization parameters

|                     |                                  |
|---------------------|----------------------------------|
| Parameters          | f, b1, b2, cx, cy, k1-k4, p1, p2 |
| Fit rolling shutter | No                               |
| Optimization time   | 31 seconds                       |

## Dense Point Cloud

|        |            |
|--------|------------|
| Points | 52,596,413 |
|--------|------------|

### Reconstruction parameters

|                             |                     |
|-----------------------------|---------------------|
| Quality                     | High                |
| Depth filtering             | Aggressive          |
| Depth maps generation time  | 13 hours 58 minutes |
| Dense cloud generation time | 4 hours 16 minutes  |

## Model

|          |           |
|----------|-----------|
| Faces    | 3,485,896 |
| Vertices | 1,745,198 |

### Reconstruction parameters

|                 |                      |
|-----------------|----------------------|
| Surface type    | Height field         |
| Source data     | Dense                |
| Interpolation   | Enabled              |
| Quality         | High                 |
| Depth filtering | Aggressive           |
| Face count      | 3,506,419            |
| Processing time | 2 minutes 43 seconds |

## Orthomosaic

|                   |                                                 |
|-------------------|-------------------------------------------------|
| Size              | 18,942 x 20,811                                 |
| Coordinate system | OSGB 1936 / British National Grid (EPSG::27700) |
| Channels          | 3, uint8                                        |

### Reconstruction parameters

|                         |                       |
|-------------------------|-----------------------|
| Blending mode           | Mosaic                |
| Surface                 | Mesh                  |
| Enable color correction | No                    |
| Enable hole filling     | Yes                   |
| Processing time         | 30 minutes 57 seconds |

## Software

|          |                  |
|----------|------------------|
| Version  | 1.3.2 build 4205 |
| Platform | Windows 64       |
