# Supplementary material
Source: MDPI journal article supplement (https://www.mdpi.com/2072-4292/10/9/1494)
Supplement: s1 [file s1]

# Day 5 (Survey 1)

Processing Report

13 February 2018

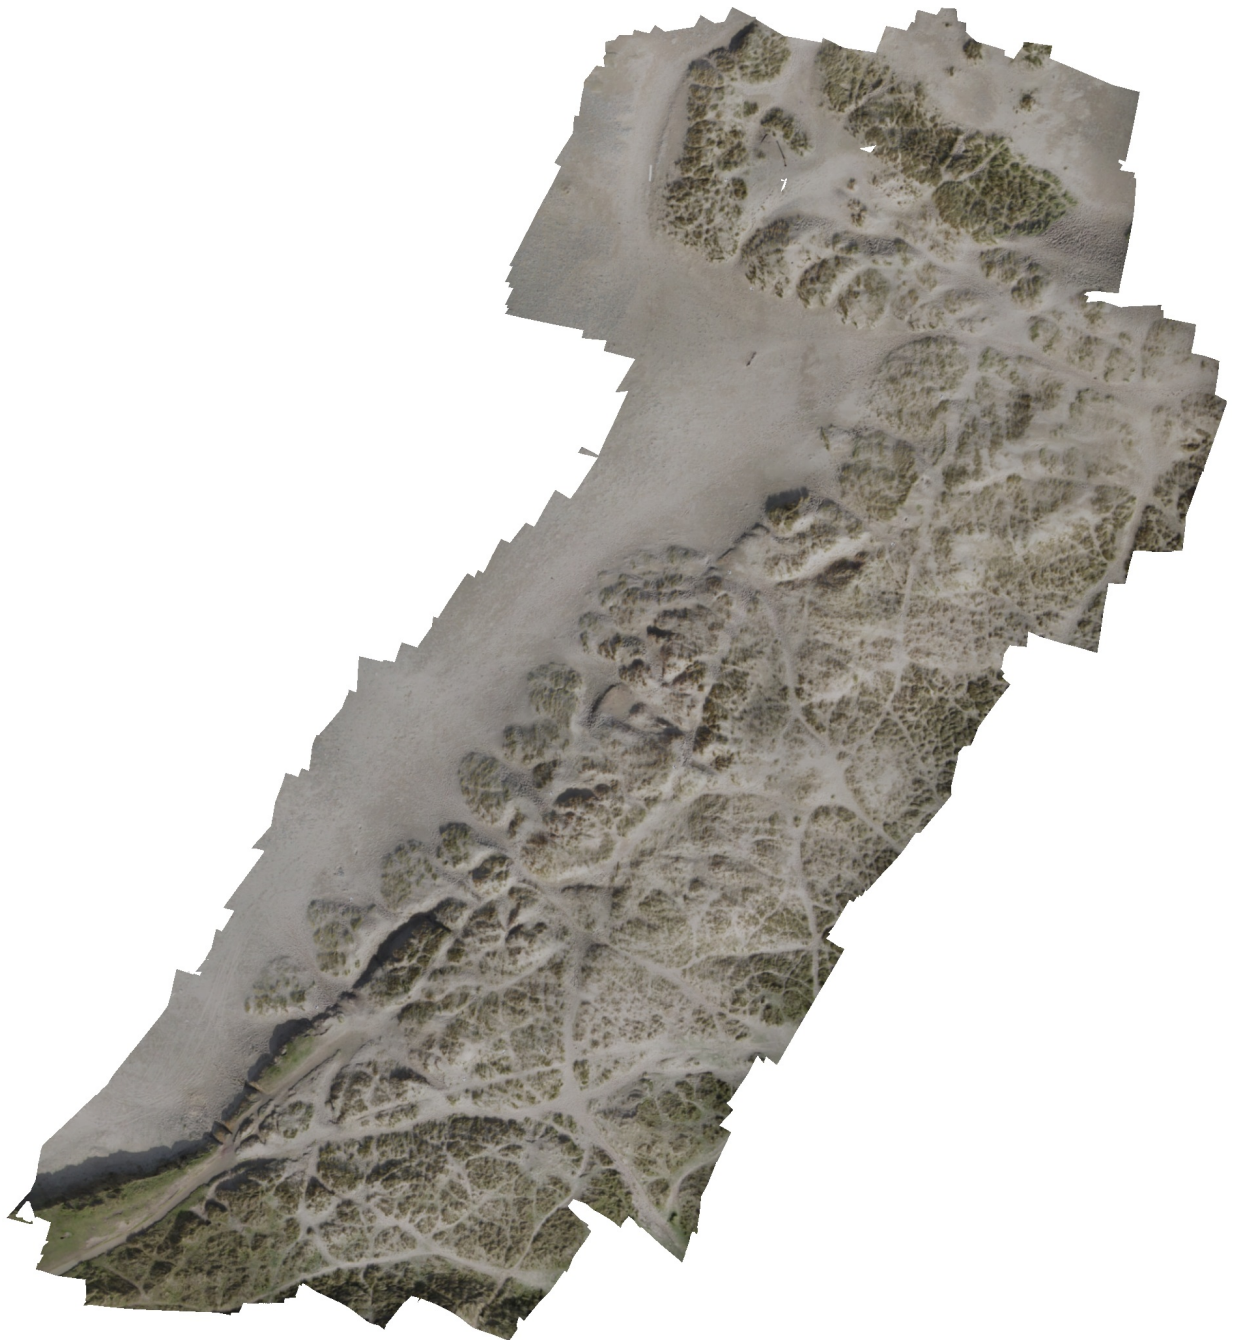

# Survey Data

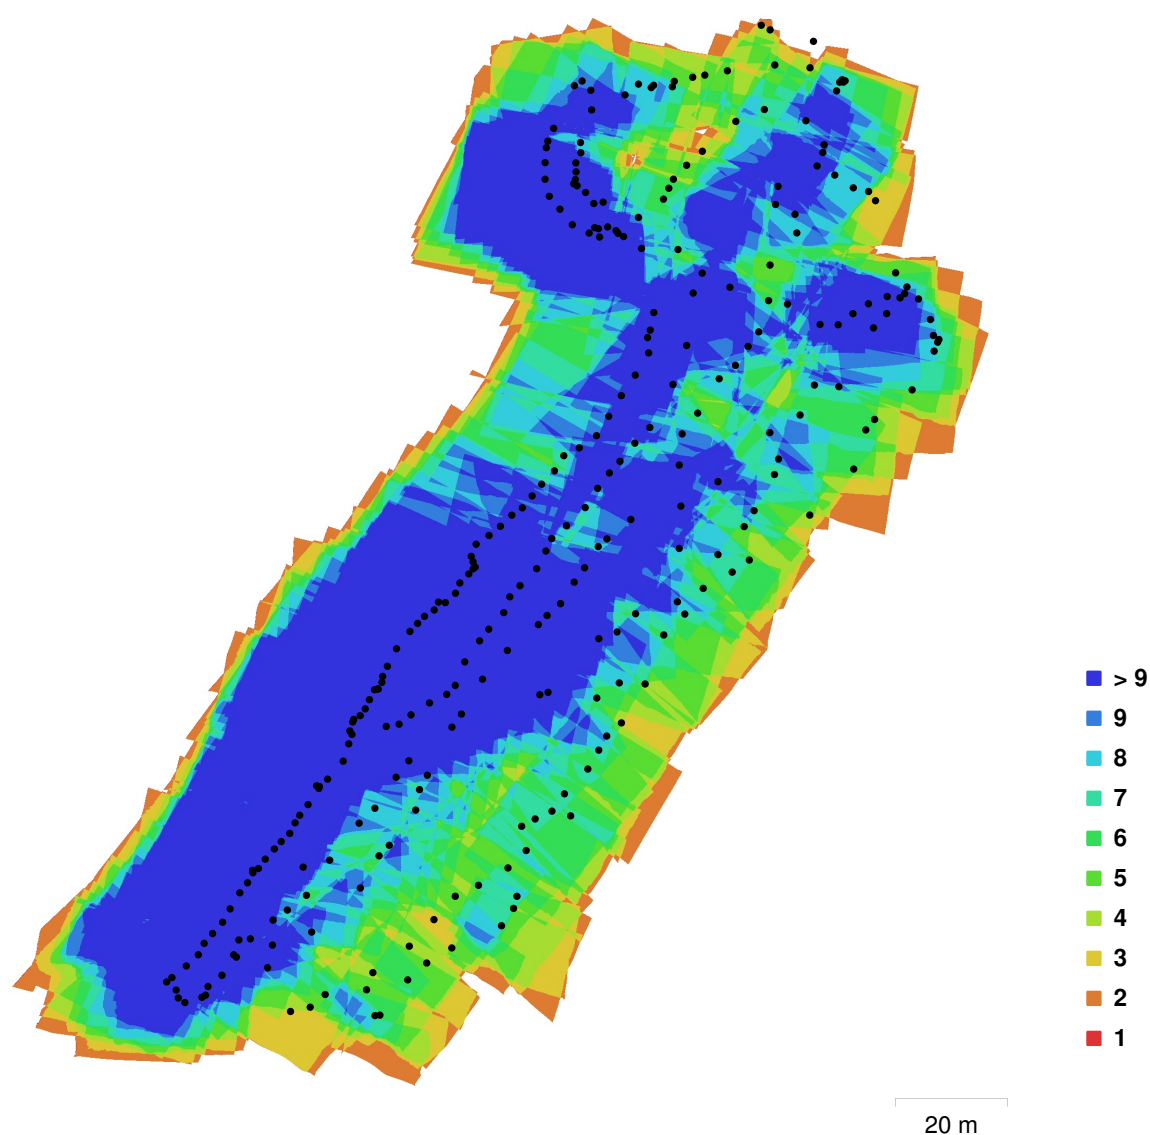

Fig. 1. Camera locations and image overlap.

|                    |                        |                     |           |
|--------------------|------------------------|---------------------|-----------|
| Number of images:  | 298                    | Camera stations:    | 297       |
| Flying altitude:   | 21 m                   | Tie points:         | 1,856,820 |
| Ground resolution: | 6.04 mm/pix            | Projections:        | 6,235,153 |
| Coverage area:     | 0.0161 km <sup>2</sup> | Reprojection error: | 0.727 pix |

| Camera Model               | Resolution  | Focal Length | Pixel Size          | Precalibrated |
|----------------------------|-------------|--------------|---------------------|---------------|
| Canon PowerShot D30 (5 mm) | 4000 x 3000 | 5 mm         | 1.55 x 1.55 $\mu$ m | No            |

Table 1. Cameras.

# Camera Calibration

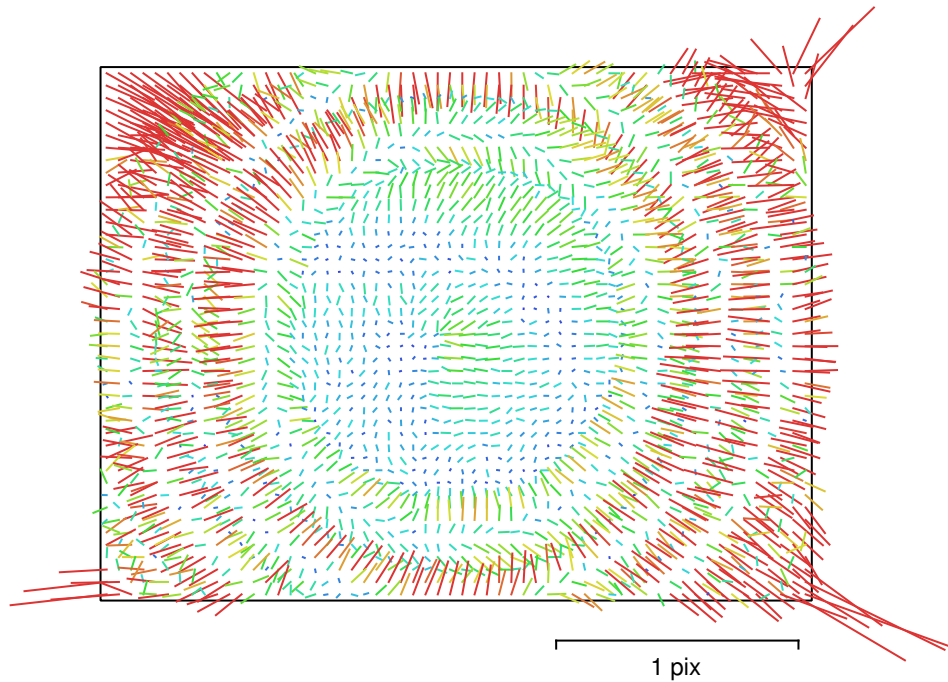

Fig. 2. Image residuals for Canon PowerShot D30 (5 mm).

## Canon PowerShot D30 (5 mm)

298 images

|       |             |              |                           |
|-------|-------------|--------------|---------------------------|
| Type  | Resolution  | Focal Length | Pixel Size                |
| Frame | 4000 x 3000 | 5 mm         | 1.55 x 1.55 $\mu\text{m}$ |

|    | Value        | Error   | F    | Cx    | Cy    | B1    | B2    | K1    | K2    | K3    | K4    | P1    | P2    |
|----|--------------|---------|------|-------|-------|-------|-------|-------|-------|-------|-------|-------|-------|
| F  | 3293.92      | 0.042   | 1.00 | -0.09 | -0.05 | -0.13 | -0.01 | -0.07 | 0.13  | -0.12 | 0.12  | -0.24 | 0.03  |
| Cx | -32.2416     | 0.052   |      | 1.00  | -0.02 | -0.36 | 0.05  | -0.04 | 0.02  | -0.03 | 0.04  | 0.92  | -0.01 |
| Cy | 3.08695      | 0.05    |      |       | 1.00  | -0.02 | -0.35 | -0.00 | -0.01 | 0.02  | -0.02 | -0.03 | 0.92  |
| B1 | -1.45392     | 0.0087  |      |       |       | 1.00  | -0.05 | 0.03  | -0.02 | 0.02  | -0.02 | -0.39 | 0.00  |
| B2 | 0.543809     | 0.0083  |      |       |       |       | 1.00  | -0.00 | 0.01  | -0.01 | 0.01  | 0.02  | -0.43 |
| K1 | -0.00469349  | 4.1e-05 |      |       |       |       |       | 1.00  | -0.96 | 0.92  | -0.86 | -0.04 | -0.00 |
| K2 | 0.0464851    | 0.00028 |      |       |       |       |       |       | 1.00  | -0.99 | 0.96  | 0.02  | -0.01 |
| K3 | -0.169397    | 0.00077 |      |       |       |       |       |       |       | 1.00  | -0.99 | -0.02 | 0.01  |
| K4 | 0.168952     | 0.00072 |      |       |       |       |       |       |       |       | 1.00  | 0.03  | -0.02 |
| P1 | -0.00371738  | 3.8e-06 |      |       |       |       |       |       |       |       |       | 1.00  | -0.04 |
| P2 | -0.000954705 | 3.6e-06 |      |       |       |       |       |       |       |       |       |       | 1.00  |

Table 2. Calibration coefficients and correlation matrix.

# Ground Control Points

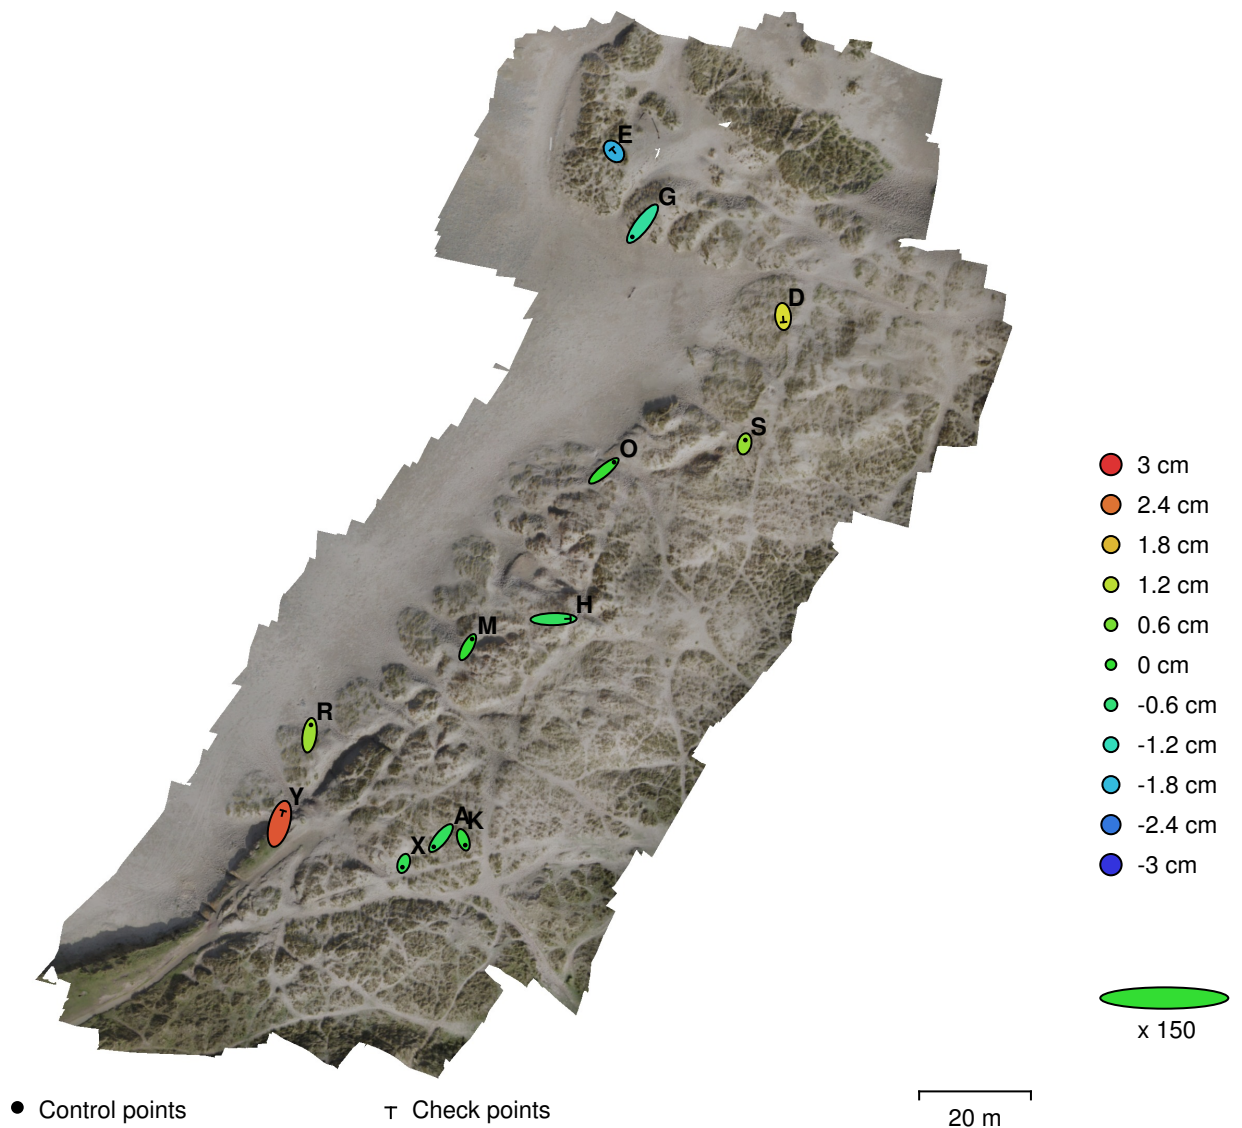

Fig. 3. GCP locations and error estimates.

Z error is represented by ellipse color. X,Y errors are represented by ellipse shape.

Estimated GCP locations are marked with a dot or crossing.

| Count | X error (cm) | Y error (cm) | Z error (cm) | XY error (cm) | Total (cm) |
|-------|--------------|--------------|--------------|---------------|------------|
| 8     | 1.43372      | 1.98663      | 0.584657     | 2.44995       | 2.51875    |

Table 3. Control points RMSE.

X - Easting, Y - Northing, Z - Altitude.

| Count | X error (cm) | Y error (cm) | Z error (cm) | XY error (cm) | Total (cm) |
|-------|--------------|--------------|--------------|---------------|------------|
| 4     | 2.09432      | 1.72981      | 1.82185      | 2.71633       | 3.27071    |

Table 4. Check points RMSE.

X - Easting, Y - Northing, Z - Altitude.

| <b>Label</b> | <b>X error (cm)</b> | <b>Y error (cm)</b> | <b>Z error (cm)</b> | <b>Total (cm)</b> | <b>Image (pix)</b> |
|--------------|---------------------|---------------------|---------------------|-------------------|--------------------|
| A            | -1.71726            | -2.0915             | -0.376565           | 2.73225           | 0.410 (8)          |
| G            | -2.43147            | -3.14958            | -0.9572             | 4.09244           | 0.779 (16)         |
| K            | 0.455657            | -1.27709            | -0.129827           | 1.36215           | 1.198 (7)          |
| M            | 1.05183             | 1.92906             | -0.0232849          | 2.19731           | 0.678 (21)         |
| O            | 2.451               | 2.05947             | 0.0214492           | 3.20145           | 0.601 (13)         |
| R            | 0.35565             | 2.45972             | 0.91559             | 2.64859           | 0.207 (18)         |
| S            | 0.208919            | 0.908351            | 0.842774            | 1.25659           | 0.606 (11)         |
| X            | -0.302993           | -0.900308           | -0.331857           | 1.00622           | 0.422 (8)          |
| <b>Total</b> | <b>1.43372</b>      | <b>1.98663</b>      | <b>0.584657</b>     | <b>2.51875</b>    | <b>0.639</b>       |

Table 5. Control points.  
X - Easting, Y - Northing, Z - Altitude.

| <b>Label</b> | <b>X error (cm)</b> | <b>Y error (cm)</b> | <b>Z error (cm)</b> | <b>Total (cm)</b> | <b>Image (pix)</b> |
|--------------|---------------------|---------------------|---------------------|-------------------|--------------------|
| D            | 0.121741            | -1.34942            | 1.44302             | 1.97941           | 0.483 (8)          |
| E            | -0.505649           | 0.613345            | -1.94736            | 2.10335           | 0.669 (9)          |
| H            | 4.05717             | 0.0832759           | -0.393885           | 4.07709           | 0.531 (18)         |
| Y            | 0.901995            | 3.12489             | 2.69199             | 4.22201           | 0.419 (12)         |
| <b>Total</b> | <b>2.09432</b>      | <b>1.72981</b>      | <b>1.82185</b>      | <b>3.27071</b>    | <b>0.527</b>       |

Table 6. Check points.  
X - Easting, Y - Northing, Z - Altitude.



# Digital Elevation Model

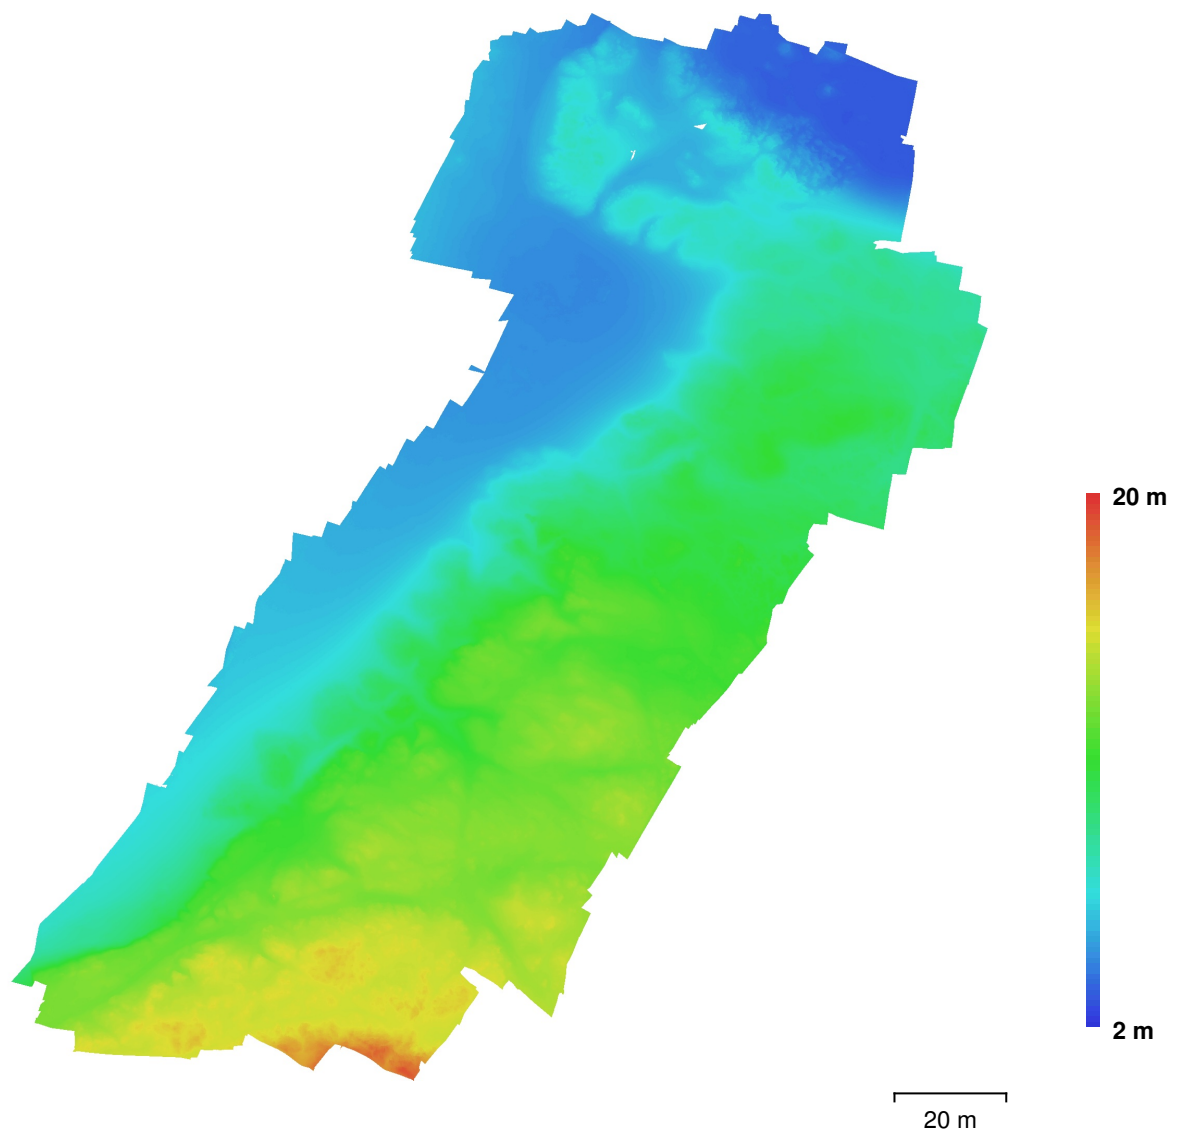

Fig. 4. Reconstructed digital elevation model.

Resolution: 1.21 cm/pix  
Point density: 68.6 points/cm<sup>2</sup>

# Processing Parameters

## General

|                   |                                                 |
|-------------------|-------------------------------------------------|
| Cameras           | 298                                             |
| Aligned cameras   | 297                                             |
| Markers           | 12                                              |
| Coordinate system | OSGB 1936 / British National Grid (EPSG::27700) |
| Rotation angles   | Yaw, Pitch, Roll                                |

## Point Cloud

|                        |                         |
|------------------------|-------------------------|
| Points                 | 1,856,820 of 1,978,333  |
| RMS reprojection error | 0.150065 (0.726912 pix) |
| Max reprojection error | 0.556412 (34.8039 pix)  |
| Mean key point size    | 4.5717 pix              |
| Effective overlap      | 3.52432                 |

### Alignment parameters

|                               |                       |
|-------------------------------|-----------------------|
| Accuracy                      | High                  |
| Generic preselection          | Yes                   |
| Reference preselection        | Yes                   |
| Key point limit               | 100,000               |
| Tie point limit               | 0                     |
| Adaptive camera model fitting | Yes                   |
| Matching time                 | 47 minutes 25 seconds |
| Alignment time                | 11 minutes 54 seconds |

### Optimization parameters

|                     |                                  |
|---------------------|----------------------------------|
| Parameters          | f, b1, b2, cx, cy, k1-k4, p1, p2 |
| Fit rolling shutter | No                               |
| Optimization time   | 35 seconds                       |

## Depth Maps

|       |     |
|-------|-----|
| Count | 297 |
|-------|-----|

### Reconstruction parameters

|                 |                    |
|-----------------|--------------------|
| Quality         | High               |
| Filtering mode  | Aggressive         |
| Processing time | 6 hours 29 minutes |

## Dense Point Cloud

|        |             |
|--------|-------------|
| Points | 130,432,521 |
|--------|-------------|

### Reconstruction parameters

|                             |                    |
|-----------------------------|--------------------|
| Quality                     | High               |
| Depth filtering             | Aggressive         |
| Depth maps generation time  | 6 hours 29 minutes |
| Dense cloud generation time | 1 hours 3 minutes  |

## Model

|                                  |                      |
|----------------------------------|----------------------|
| Faces                            | 25,784,033           |
| Vertices                         | 12,903,469           |
| <b>Reconstruction parameters</b> |                      |
| Surface type                     | Height field         |
| Source data                      | Dense                |
| Interpolation                    | Enabled              |
| Quality                          | High                 |
| Depth filtering                  | Aggressive           |
| Face count                       | 26,086,504           |
| Processing time                  | 12 minutes 1 seconds |

## Orthomosaic

|                                  |                                                 |
|----------------------------------|-------------------------------------------------|
| Size                             | 28,940 x 31,625                                 |
| Coordinate system                | OSGB 1936 / British National Grid (EPSG::27700) |
| Channels                         | 3, uint8                                        |
| <b>Reconstruction parameters</b> |                                                 |
| Blending mode                    | Mosaic                                          |
| Surface                          | Mesh                                            |



Enable color correction

Enable hole filling

Processing time

**Software**

Version

Platform

No

Yes

46 minutes 8 seconds

1.3.2 build 4205

Linux 64
