# Supplementary material
Source: MDPI journal article supplement (https://www.mdpi.com/2072-4292/10/9/1494)
Supplement: s1 [file s1]

# **day11\_drone**

**Processing Report**

**14 June 2018**

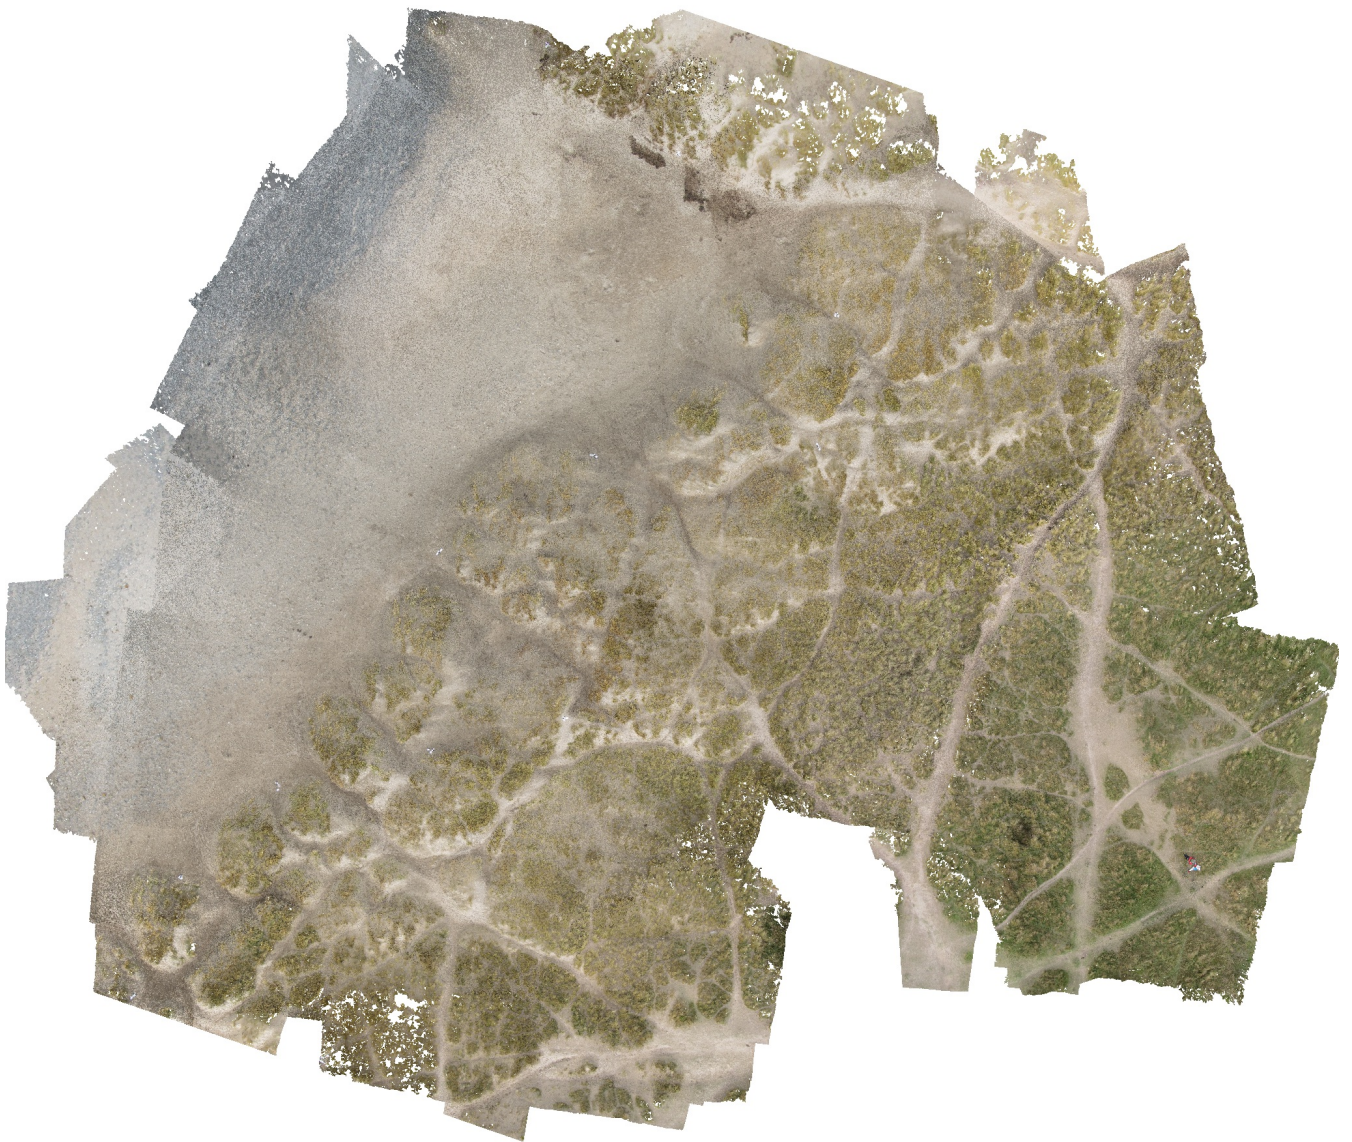

# Survey Data

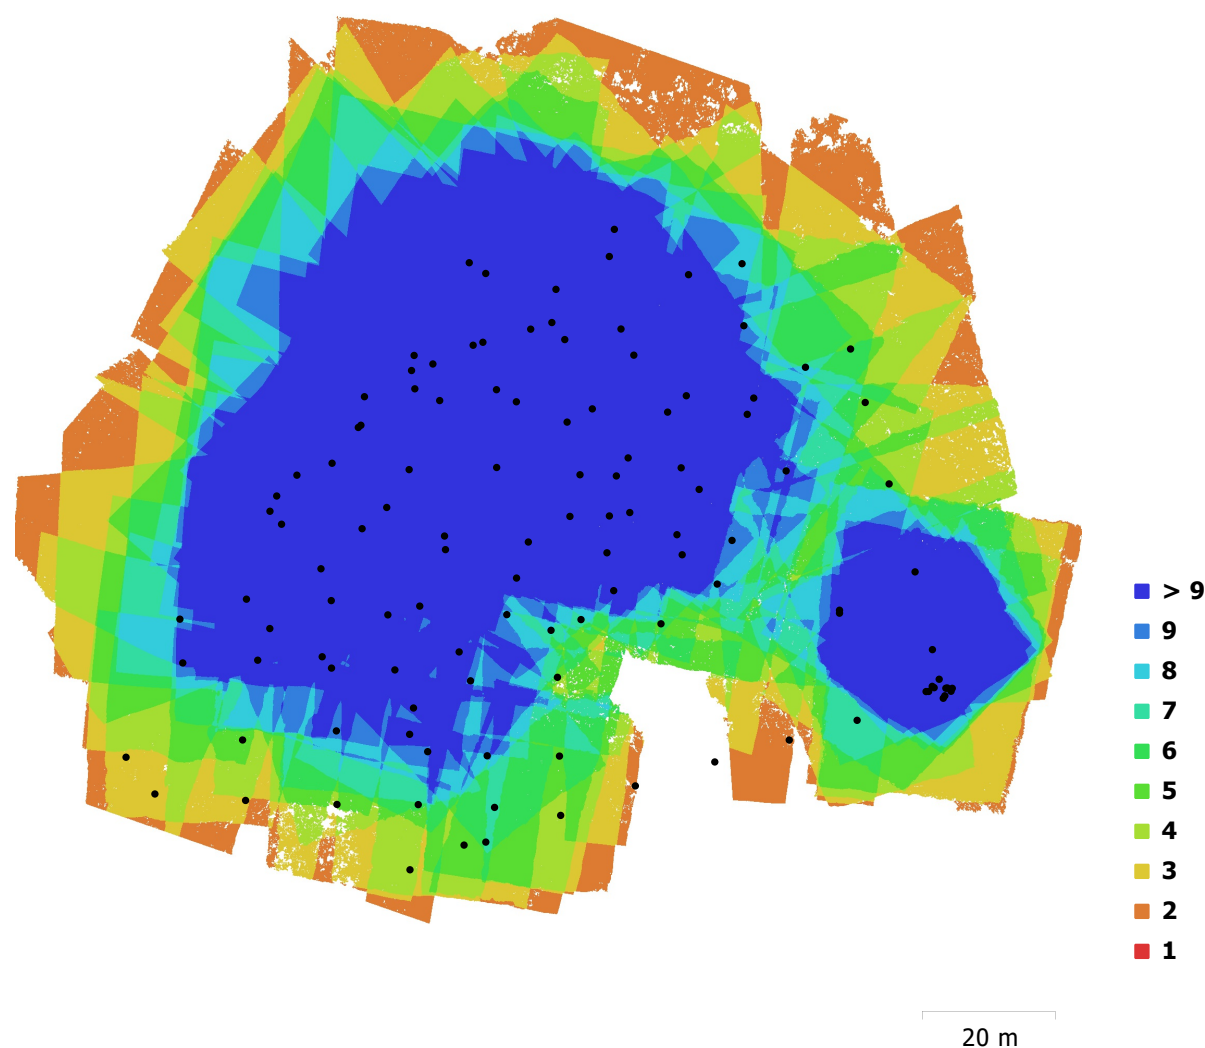

Fig. 1. Camera locations and image overlap.

|                    |                        |                     |           |
|--------------------|------------------------|---------------------|-----------|
| Number of images:  | 118                    | Camera stations:    | 118       |
| Flying altitude:   | 32.8 m                 | Tie points:         | 370,378   |
| Ground resolution: | 9.43 mm/pix            | Projections:        | 1,088,322 |
| Coverage area:     | 0.0149 km <sup>2</sup> | Reprojection error: | 1.14 pix  |

| Camera Model               | Resolution  | Focal Length | Pixel Size     | Precalibrated |
|----------------------------|-------------|--------------|----------------|---------------|
| Canon PowerShot D30 (5 mm) | 4000 x 3000 | 5 mm         | 1.55 x 1.55 μm | No            |

Table 1. Cameras.

# Camera Calibration

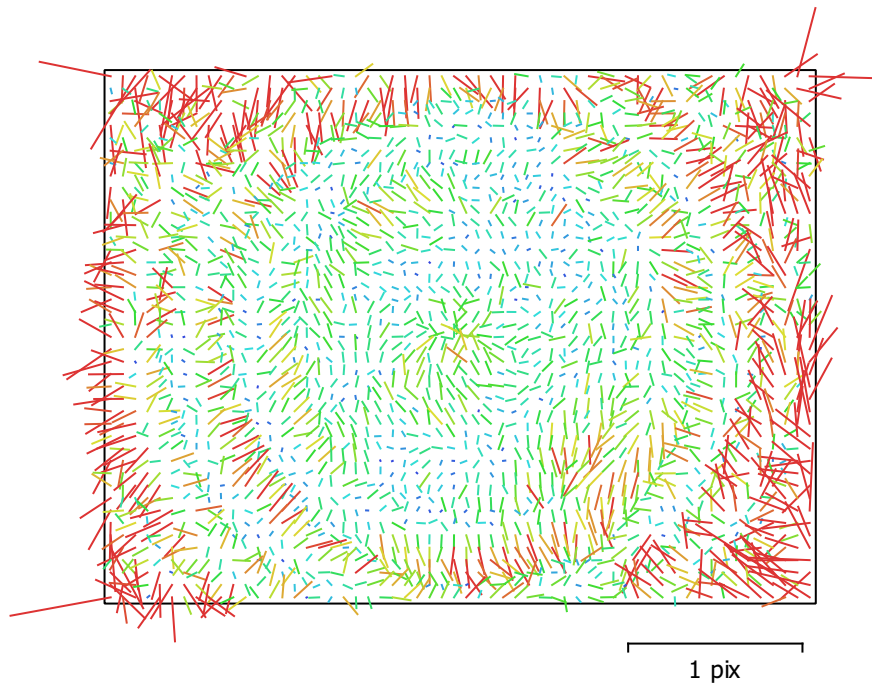

Fig. 2. Image residuals for Canon PowerShot D30 (5 mm).

## Canon PowerShot D30 (5 mm)

118 images

Type  
**Frame**

Resolution  
**4000 x 3000**

Focal Length  
**5 mm**

Pixel Size  
**1.55 x 1.55  $\mu\text{m}$**

|           | Value              | Error   | F    | Cx   | Cy    | B1    | B2    | K1    | K2    | K3    | P1    | P2    |
|-----------|--------------------|---------|------|------|-------|-------|-------|-------|-------|-------|-------|-------|
| <b>F</b>  | <b>3281.51</b>     | 0.18    | 1.00 | 0.12 | -0.05 | -0.03 | 0.13  | 0.07  | 0.05  | -0.04 | 0.14  | -0.13 |
| <b>Cx</b> | <b>-13.9734</b>    | 0.07    |      | 1.00 | -0.02 | 0.15  | -0.18 | 0.04  | -0.02 | 0.02  | 0.79  | -0.04 |
| <b>Cy</b> | <b>-5.16352</b>    | 0.069   |      |      | 1.00  | 0.26  | 0.18  | -0.00 | -0.01 | 0.01  | -0.01 | 0.73  |
| <b>B1</b> | <b>-0.966119</b>   | 0.014   |      |      |       | 1.00  | -0.03 | 0.02  | -0.03 | 0.03  | 0.09  | 0.10  |
| <b>B2</b> | <b>1.08468</b>     | 0.015   |      |      |       |       | 1.00  | 0.01  | 0.00  | -0.00 | -0.05 | 0.08  |
| <b>K1</b> | <b>0.00494249</b>  | 9.5e-05 |      |      |       |       |       | 1.00  | -0.94 | 0.89  | 0.04  | -0.01 |
| <b>K2</b> | <b>-0.0355456</b>  | 0.00043 |      |      |       |       |       |       | 1.00  | -0.98 | -0.01 | -0.01 |
| <b>K3</b> | <b>0.0323457</b>   | 0.00059 |      |      |       |       |       |       |       | 1.00  | 0.01  | 0.01  |
| <b>P1</b> | <b>-0.00116071</b> | 6.3e-06 |      |      |       |       |       |       |       |       | 1.00  | -0.03 |
| <b>P2</b> | <b>0.000453444</b> | 5.8e-06 |      |      |       |       |       |       |       |       |       | 1.00  |

Table 2. Calibration coefficients and correlation matrix.



# Ground Control Points

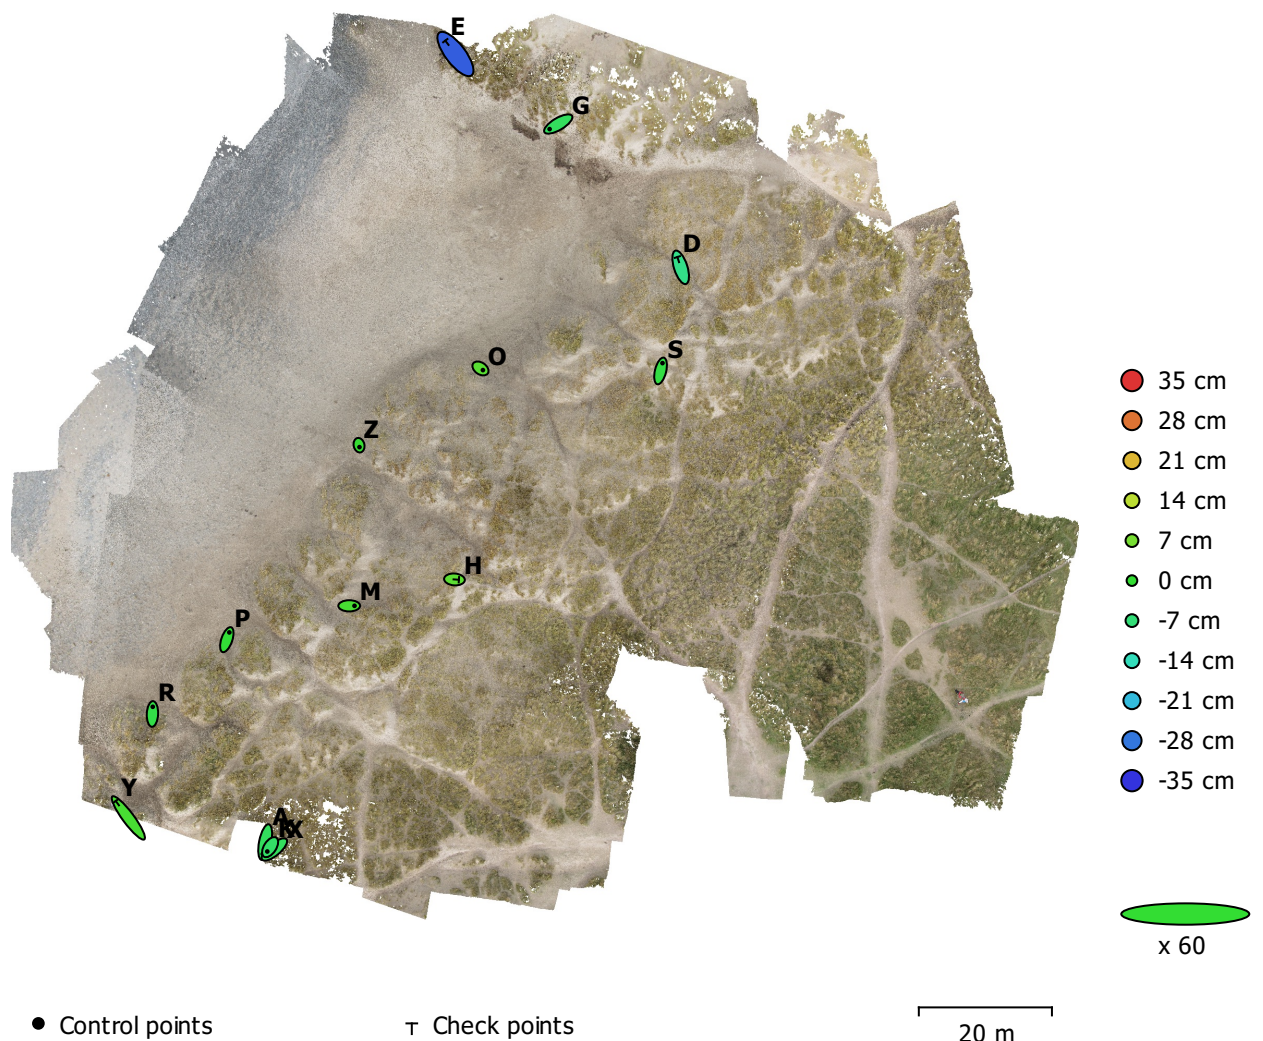

Fig. 3. GCP locations and error estimates.

Z error is represented by ellipse color. X,Y errors are represented by ellipse shape.

Estimated GCP locations are marked with a dot or crossing.

| Count | X error (cm) | Y error (cm) | Z error (cm) | XY error (cm) | Total (cm) |
|-------|--------------|--------------|--------------|---------------|------------|
| 10    | 2.17594      | 3.15434      | 3.47633      | 3.83204       | 5.17392    |

Table 3. Control points RMSE.

X - Easting, Y - Northing, Z - Altitude.

| Count | X error (cm) | Y error (cm) | Z error (cm) | XY error (cm) | Total (cm) |
|-------|--------------|--------------|--------------|---------------|------------|
| 4     | 4.27913      | 5.98025      | 16.1209      | 7.35352       | 17.7189    |

Table 4. Check points RMSE.

X - Easting, Y - Northing, Z - Altitude.

| <b>Label</b> | <b>X error (cm)</b> | <b>Y error (cm)</b> | <b>Z error (cm)</b> | <b>Total (cm)</b> | <b>Image (pix)</b> |
|--------------|---------------------|---------------------|---------------------|-------------------|--------------------|
| S            | 0.966257            | 3.92157             | -1.83595            | 4.43656           | 1.212 (15)         |
| Z            | 0.218434            | -0.961926           | 0.389668            | 1.06059           | 1.403 (18)         |
| G            | -4.32196            | -2.54333            | -4.53279            | 6.75974           | 1.184 (5)          |
| O            | 1.22915             | -0.820305           | 3.83885             | 4.11345           | 1.178 (20)         |
| M            | 2.64928             | 0.0100555           | 1.85231             | 3.23262           | 1.081 (14)         |
| P            | 1.25889             | 3.62272             | -0.843933           | 3.92698           | 1.838 (13)         |
| R            | 0.149885            | 3.58828             | -2.18832            | 4.20558           | 1.759 (4)          |
| A            | -1.20168            | -5.95171            | -4.79524            | 7.73701           | 1.533 (2)          |
| X            | -3.7543             | -3.13988            | -4.67913            | 6.77111           | 1.169 (2)          |
| K            | -1.41809            | -2.18429            | -5.31248            | 5.91647           | 0.995 (2)          |
| <b>Total</b> | <b>2.17594</b>      | <b>3.15434</b>      | <b>3.47633</b>      | <b>5.17392</b>    | <b>1.354</b>       |

Table 5. Control points.  
X - Easting, Y - Northing, Z - Altitude.

| <b>Label</b> | <b>X error (cm)</b> | <b>Y error (cm)</b> | <b>Z error (cm)</b> | <b>Total (cm)</b> | <b>Image (pix)</b> |
|--------------|---------------------|---------------------|---------------------|-------------------|--------------------|
| D            | -1.65312            | 5.14976             | -8.85262            | 10.3741           | 0.976 (10)         |
| H            | 2.22492             | -0.153786           | 3.96201             | 4.54658           | 1.280 (12)         |
| Y            | -6.30383            | 8.47052             | 2.1798              | 10.7814           | 1.513 (3)          |
| E            | -5.08157            | 6.6903              | -30.6712            | 31.801            | 0.195 (2)          |
| <b>Total</b> | <b>4.27913</b>      | <b>5.98025</b>      | <b>16.1209</b>      | <b>17.7189</b>    | <b>1.157</b>       |

Table 6. Check points.  
X - Easting, Y - Northing, Z - Altitude.

# Digital Elevation Model

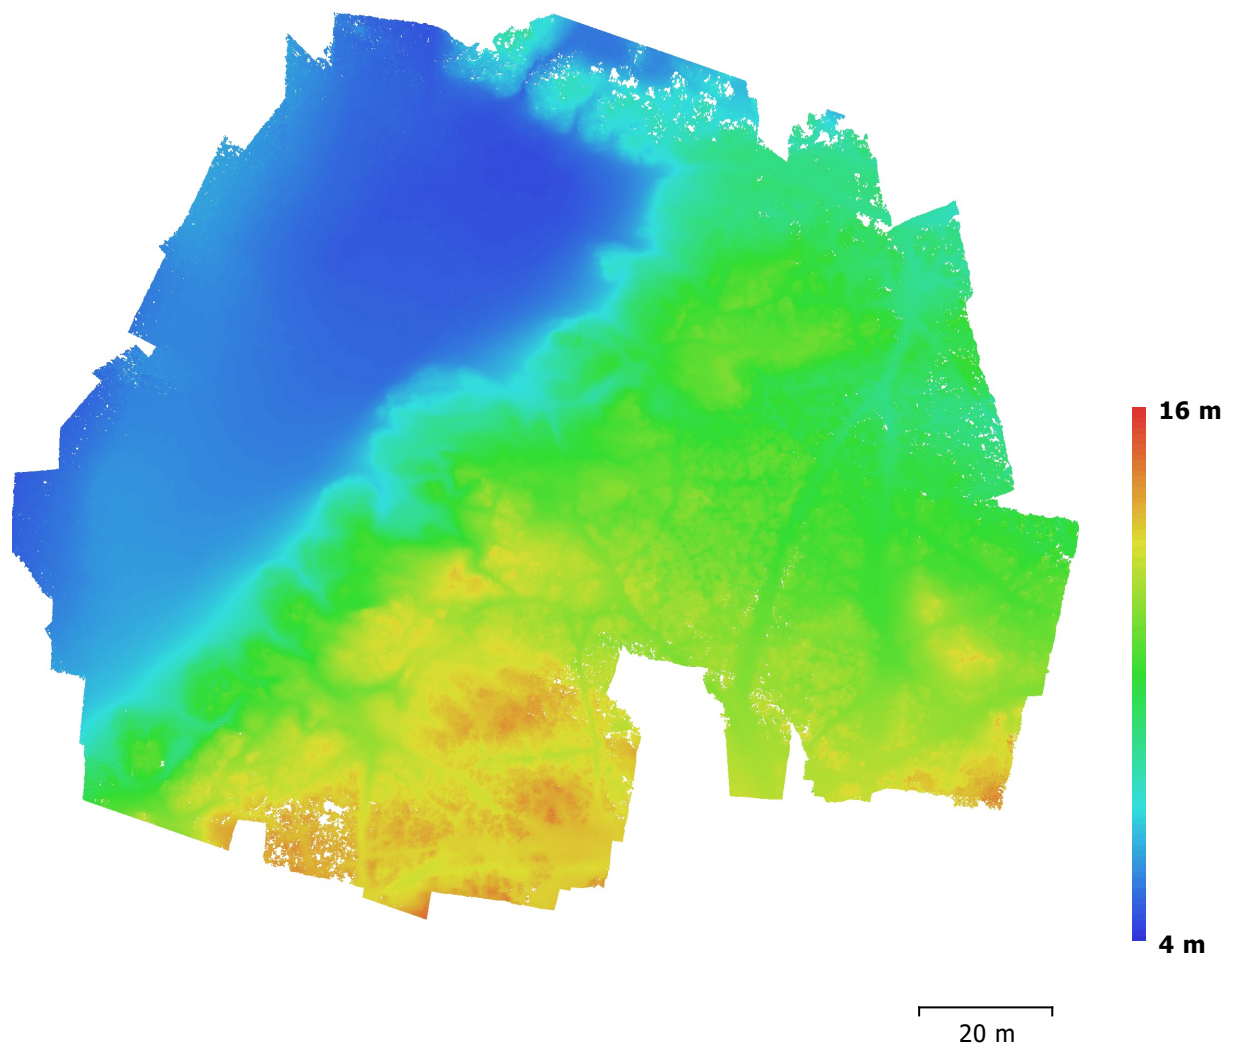

Fig. 4. Reconstructed digital elevation model.

Resolution: unknown

Point density: unknown

# Processing Parameters

## General

|                   |                                                 |
|-------------------|-------------------------------------------------|
| Cameras           | 118                                             |
| Aligned cameras   | 118                                             |
| Markers           | 14                                              |
| Coordinate system | OSGB 1936 / British National Grid (EPSG::27700) |
| Rotation angles   | Yaw, Pitch, Roll                                |

## Point Cloud

|                        |                        |
|------------------------|------------------------|
| Points                 | 370,378 of 388,631     |
| RMS reprojection error | 0.225874 (1.13716 pix) |
| Max reprojection error | 1.22988 (46.0722 pix)  |
| Mean key point size    | 5.0279 pix             |
| Effective overlap      | 3.05623                |

## Alignment parameters

|                               |                      |
|-------------------------------|----------------------|
| Accuracy                      | High                 |
| Generic preselection          | Yes                  |
| Reference preselection        | Yes                  |
| Key point limit               | 100,000              |
| Tie point limit               | 0                    |
| Adaptive camera model fitting | Yes                  |
| Matching time                 | 37 minutes 7 seconds |
| Alignment time                | 6 minutes 5 seconds  |

## Optimization parameters

|                     |                                  |
|---------------------|----------------------------------|
| Parameters          | f, b1, b2, cx, cy, k1-k3, p1, p2 |
| Fit rolling shutter | No                               |
| Optimization time   | 19 seconds                       |

## Dense Point Cloud

|        |            |
|--------|------------|
| Points | 48,277,528 |
|--------|------------|

## Reconstruction parameters

|                             |                       |
|-----------------------------|-----------------------|
| Quality                     | High                  |
| Depth filtering             | Aggressive            |
| Depth maps generation time  | 1 hours 57 minutes    |
| Dense cloud generation time | 37 minutes 40 seconds |

## Software

|          |                  |
|----------|------------------|
| Version  | 1.3.2 build 4205 |
| Platform | Windows 64       |
