# Supplementary material
Source: MDPI journal article supplement (https://www.mdpi.com/2072-4292/10/9/1494)
Supplement: s1 [file s1]

# Day 9 (Survey 4)

Processing Report

13 February 2018

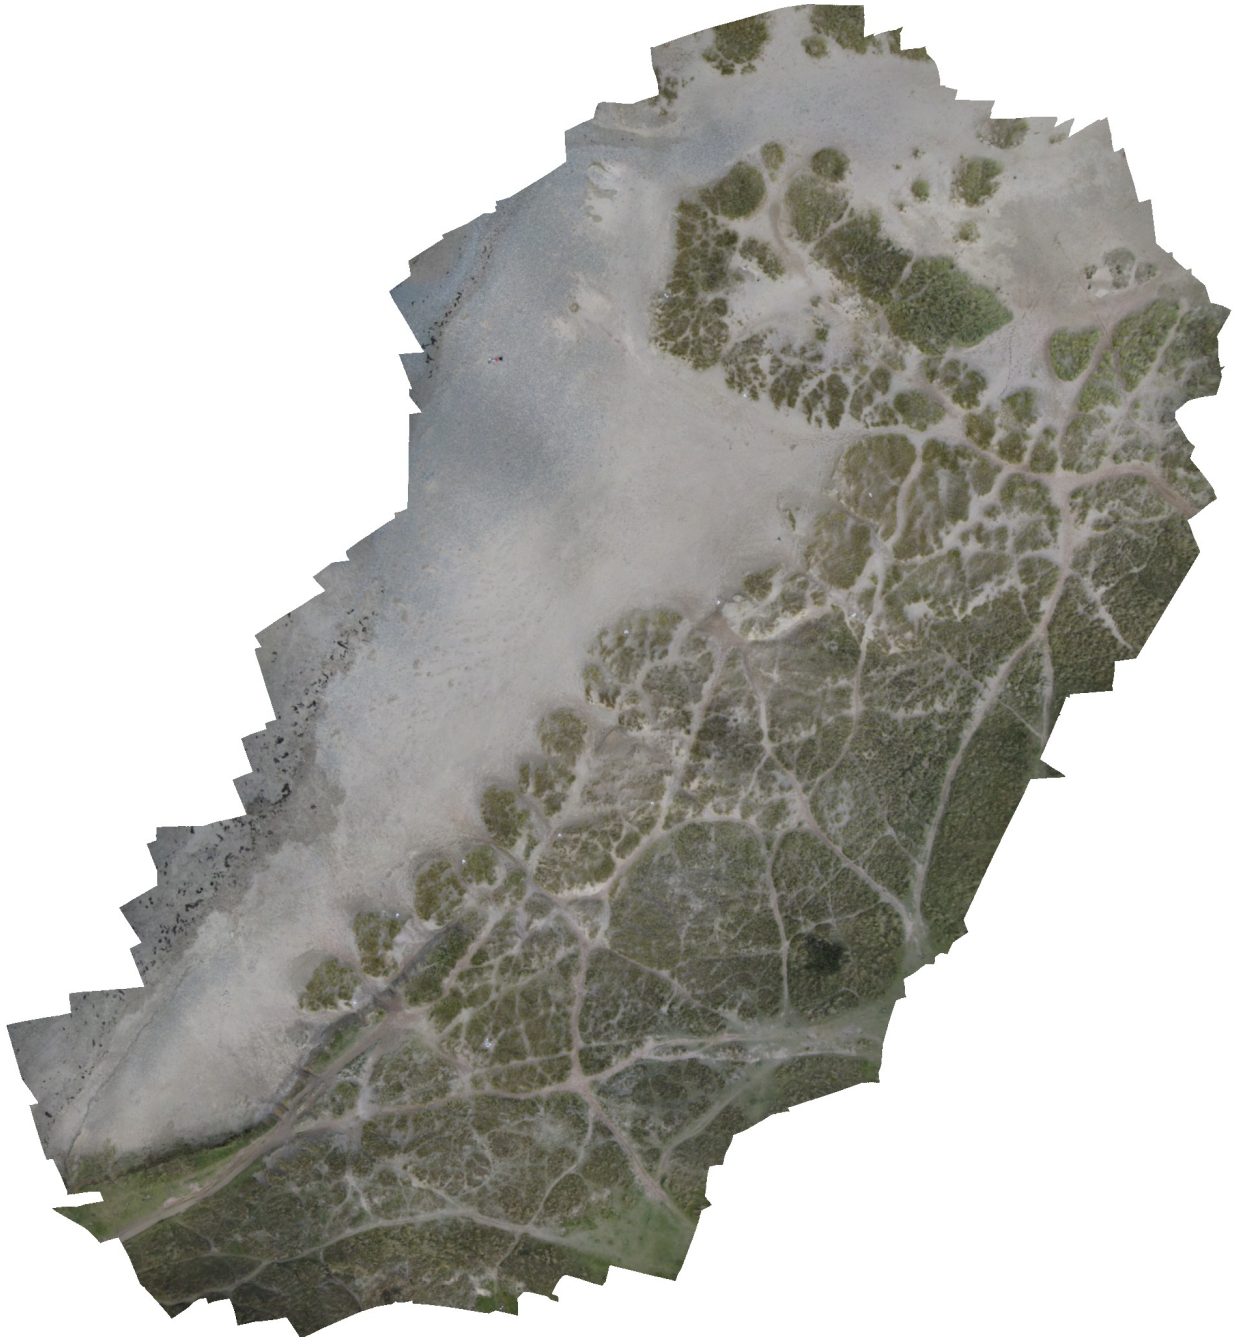

# Survey Data

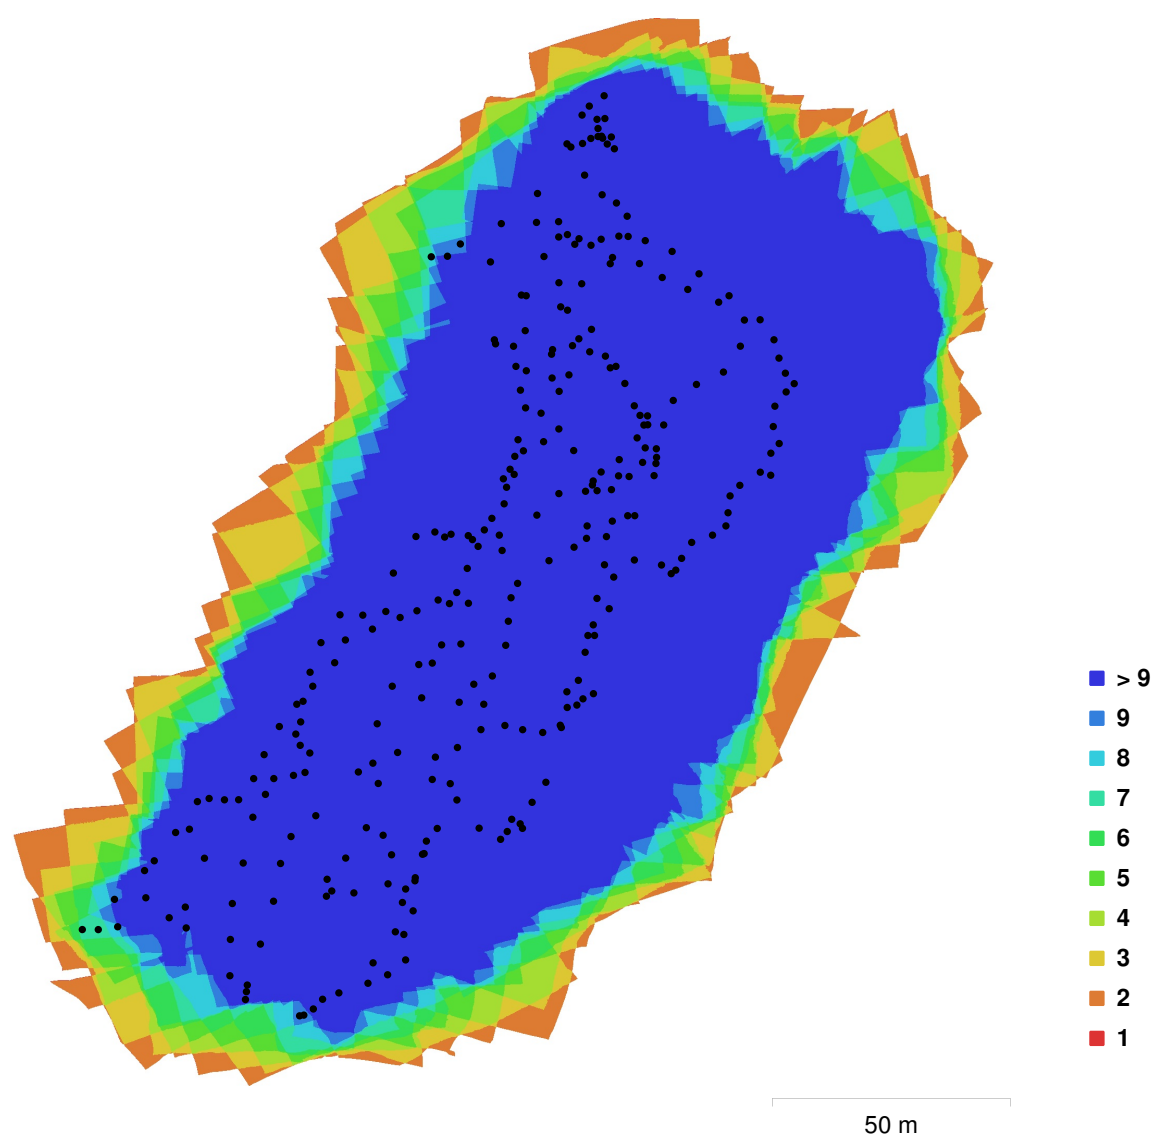

Fig. 1. Camera locations and image overlap.

|                    |                        |                     |           |
|--------------------|------------------------|---------------------|-----------|
| Number of images:  | 298                    | Camera stations:    | 298       |
| Flying altitude:   | 40.1 m                 | Tie points:         | 1,232,351 |
| Ground resolution: | 1.16 cm/pix            | Projections:        | 4,215,961 |
| Coverage area:     | 0.0264 km <sup>2</sup> | Reprojection error: | 1.21 pix  |

| Camera Model               | Resolution  | Focal Length | Pixel Size     | Precalibrated |
|----------------------------|-------------|--------------|----------------|---------------|
| Canon PowerShot D30 (5 mm) | 4000 x 3000 | 5 mm         | 1.55 x 1.55 μm | No            |

Table 1. Cameras.

# Camera Calibration

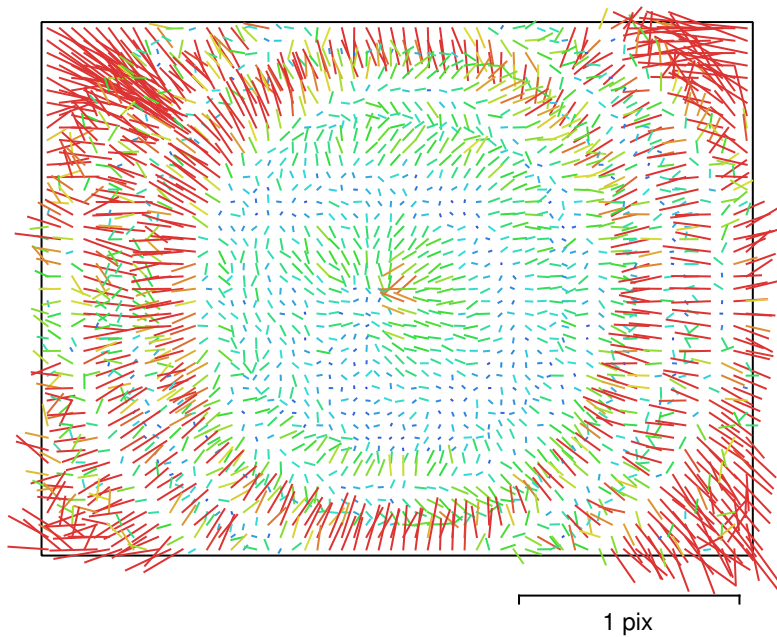

Fig. 2. Image residuals for Canon PowerShot D30 (5 mm).

## Canon PowerShot D30 (5 mm)

298 images

|       |             |              |                           |
|-------|-------------|--------------|---------------------------|
| Type  | Resolution  | Focal Length | Pixel Size                |
| Frame | 4000 x 3000 | 5 mm         | 1.55 x 1.55 $\mu\text{m}$ |

|    | Value       | Error   | F    | Cx   | Cy    | B1    | B2    | K1    | K2    | P1    | P2    |
|----|-------------|---------|------|------|-------|-------|-------|-------|-------|-------|-------|
| F  | 3293.36     | 0.09    | 1.00 | 0.09 | -0.26 | 0.04  | 0.21  | 0.24  | -0.01 | -0.09 | -0.00 |
| Cx | -30.3648    | 0.064   |      | 1.00 | -0.02 | -0.31 | 0.36  | 0.02  | -0.02 | 0.89  | -0.02 |
| Cy | 2.23319     | 0.075   |      |      | 1.00  | -0.39 | -0.40 | -0.10 | 0.02  | 0.05  | 0.88  |
| B1 | -1.68816    | 0.0082  |      |      |       | 1.00  | 0.03  | -0.01 | -0.00 | -0.30 | -0.21 |
| B2 | 0.430692    | 0.0083  |      |      |       |       | 1.00  | 0.05  | -0.01 | 0.15  | -0.31 |
| K1 | 0.00222779  | 1.8e-05 |      |      |       |       |       | 1.00  | -0.82 | 0.01  | -0.11 |
| K2 | -0.00883801 | 3.2e-05 |      |      |       |       |       |       | 1.00  | -0.01 | 0.01  |
| P1 | -0.00354208 | 4.6e-06 |      |      |       |       |       |       |       | 1.00  | -0.01 |
| P2 | -0.00108885 | 5.1e-06 |      |      |       |       |       |       |       |       | 1.00  |

Table 2. Calibration coefficients and correlation matrix.

# Ground Control Points

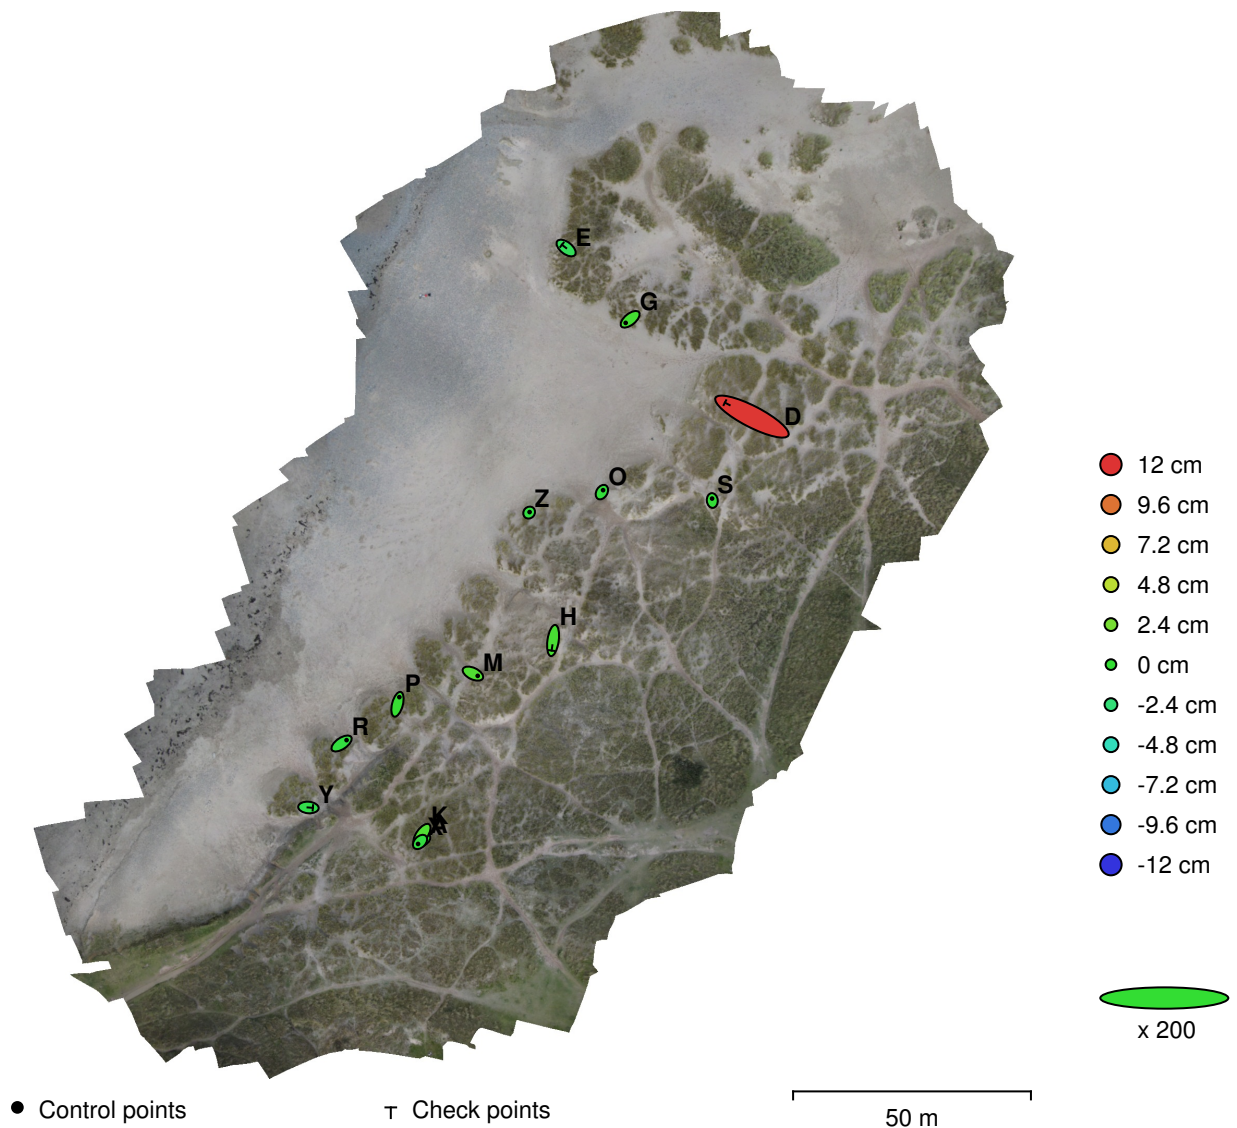

Fig. 3. GCP locations and error estimates.

Z error is represented by ellipse color. X,Y errors are represented by ellipse shape.

Estimated GCP locations are marked with a dot or crossing.

| Count | X error (cm) | Y error (cm) | Z error (cm) | XY error (cm) | Total (cm) |
|-------|--------------|--------------|--------------|---------------|------------|
| 10    | 0.660104     | 0.746251     | 0.577163     | 0.996307      | 1.15141    |

Table 3. Control points RMSE.

X - Easting, Y - Northing, Z - Altitude.

| Count | X error (cm) | Y error (cm) | Z error (cm) | XY error (cm) | Total (cm) |
|-------|--------------|--------------|--------------|---------------|------------|
| 4     | 2.9182       | 1.83849      | 5.93999      | 3.44905       | 6.86873    |

Table 4. Check points RMSE.

X - Easting, Y - Northing, Z - Altitude.

| Label        | X error (cm)    | Y error (cm)    | Z error (cm)    | Total (cm)     | Image (pix)  |
|--------------|-----------------|-----------------|-----------------|----------------|--------------|
| A            | -0.563179       | -0.357057       | -0.0585325      | 0.669393       | 0.871 (28)   |
| G            | -0.94114        | -0.760243       | 0.540041        | 1.3249         | 0.694 (41)   |
| K            | -0.807629       | -1.1674         | 0.957036        | 1.71202        | 0.761 (29)   |
| M            | 1.00121         | -0.475247       | 0.934028        | 1.44937        | 0.845 (28)   |
| O            | 0.251217        | 0.413633        | -0.370993       | 0.609786       | 0.728 (63)   |
| P            | 0.393816        | 1.50042         | 0.0944458       | 1.55412        | 0.610 (33)   |
| R            | 1.0483          | 0.709096        | -0.587199       | 1.39519        | 0.798 (26)   |
| S            | -0.0387573      | 0.404595        | -0.290728       | 0.499722       | 0.701 (42)   |
| X            | -0.415086       | -0.417487       | -0.592608       | 0.83533        | 0.822 (27)   |
| Z            | 0.094058        | 0.107665        | -0.566313       | 0.584079       | 0.705 (43)   |
| <b>Total</b> | <b>0.660104</b> | <b>0.746251</b> | <b>0.577163</b> | <b>1.15141</b> | <b>0.746</b> |

Table 5. Control points.  
X - Easting, Y - Northing, Z - Altitude.

| Label        | X error (cm)  | Y error (cm)   | Z error (cm)   | Total (cm)     | Image (pix)  |
|--------------|---------------|----------------|----------------|----------------|--------------|
| D            | -5.68546      | 2.93355        | 11.7433        | 13.3729        | 4.193 (57)   |
| E            | -0.878407     | 0.683758       | -1.35404       | 1.75287        | 0.661 (27)   |
| H            | -0.300451     | -2.10748       | 0.626811       | 2.21915        | 0.432 (32)   |
| Y            | 0.93658       | -0.0742056     | -1.00147       | 1.37318        | 0.594 (26)   |
| <b>Total</b> | <b>2.9182</b> | <b>1.83849</b> | <b>5.93999</b> | <b>6.86873</b> | <b>2.692</b> |

Table 6. Check points.  
X - Easting, Y - Northing, Z - Altitude.



# Digital Elevation Model

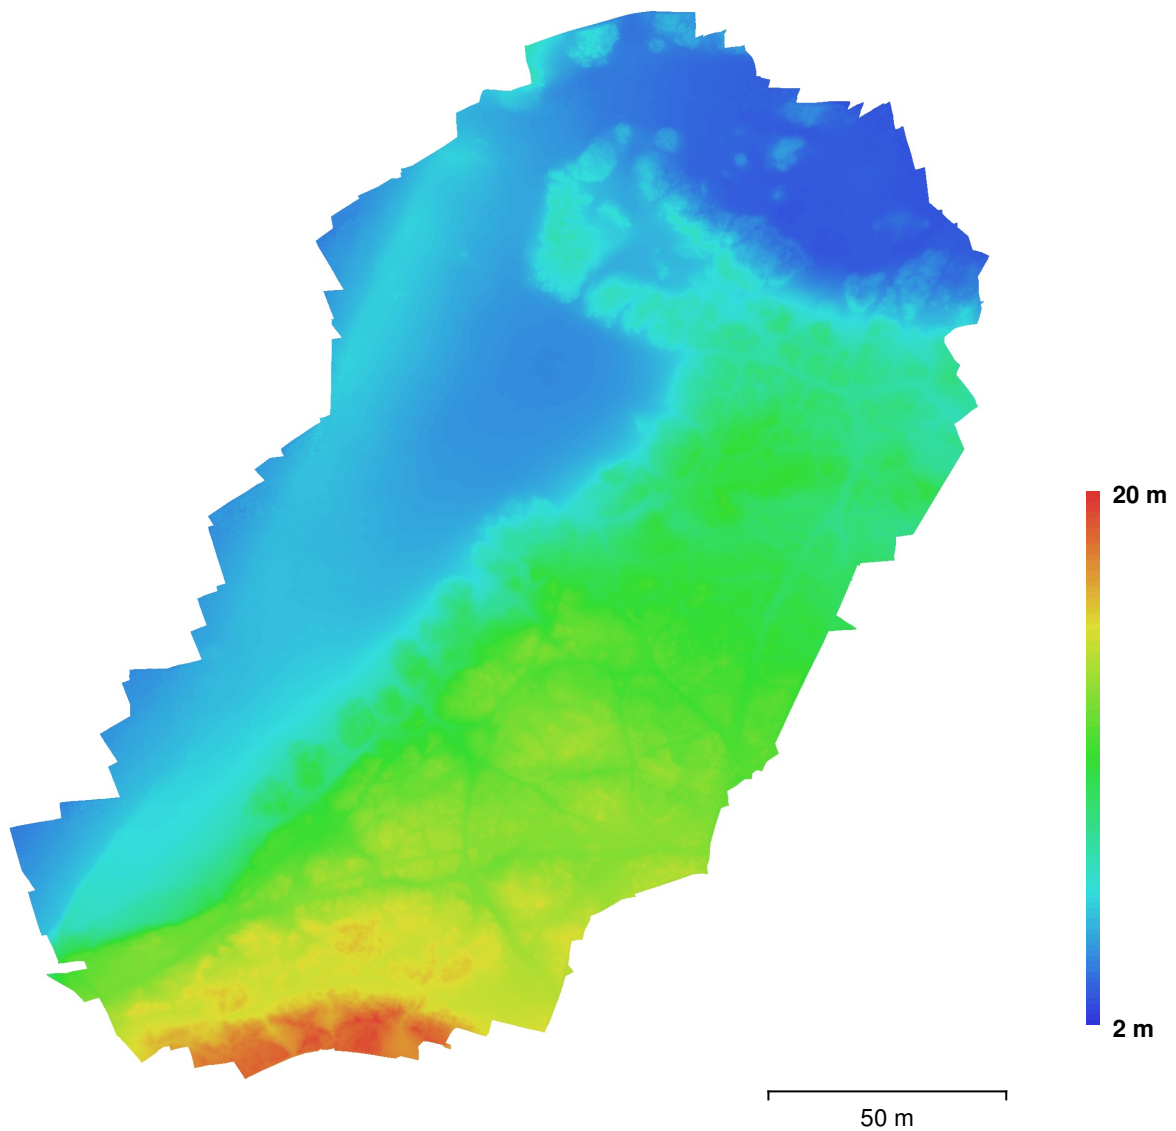

Fig. 4. Reconstructed digital elevation model.

Resolution: 2.32 cm/pix  
Point density: 18.5 points/cm<sup>2</sup>

# Processing Parameters

## General

|                   |                                                 |
|-------------------|-------------------------------------------------|
| Cameras           | 298                                             |
| Aligned cameras   | 298                                             |
| Markers           | 14                                              |
| Coordinate system | OSGB 1936 / British National Grid (EPSG::27700) |
| Rotation angles   | Yaw, Pitch, Roll                                |

## Point Cloud

|                        |                        |
|------------------------|------------------------|
| Points                 | 1,232,351 of 1,310,465 |
| RMS reprojection error | 0.197978 (1.21227 pix) |
| Max reprojection error | 0.715523 (47.0986 pix) |
| Mean key point size    | 5.49004 pix            |
| Effective overlap      | 3.84492                |

### Alignment parameters

|                               |                       |
|-------------------------------|-----------------------|
| Accuracy                      | High                  |
| Generic preselection          | Yes                   |
| Reference preselection        | Yes                   |
| Key point limit               | 100,000               |
| Tie point limit               | 0                     |
| Adaptive camera model fitting | Yes                   |
| Matching time                 | 1 hours 35 minutes    |
| Alignment time                | 10 minutes 57 seconds |

### Optimization parameters

|                     |                                   |
|---------------------|-----------------------------------|
| Parameters          | f, b1, b2, cx, cy, k1, k2, p1, p2 |
| Fit rolling shutter | No                                |
| Optimization time   | 29 seconds                        |

## Depth Maps

|       |     |
|-------|-----|
| Count | 298 |
|-------|-----|

### Reconstruction parameters

|                 |                |
|-----------------|----------------|
| Quality         | High           |
| Filtering mode  | Aggressive     |
| Processing time | 1 days 0 hours |

## Dense Point Cloud

|                             |                   |
|-----------------------------|-------------------|
| Points                      | 58,411,074        |
| Reconstruction parameters   |                   |
| Quality                     | High              |
| Depth filtering             | Aggressive        |
| Depth maps generation time  | 1 days 0 hours    |
| Dense cloud generation time | 4 hours 0 minutes |

## Model

|                           |                      |
|---------------------------|----------------------|
| Faces                     | 11,581,895           |
| Vertices                  | 5,797,224            |
| Reconstruction parameters |                      |
| Surface type              | Height field         |
| Source data               | Dense                |
| Interpolation             | Enabled              |
| Quality                   | High                 |
| Depth filtering           | Aggressive           |
| Face count                | 11,682,211           |
| Processing time           | 4 minutes 14 seconds |

## Orthomosaic

|                           |                                                 |
|---------------------------|-------------------------------------------------|
| Size                      | 17,737 x 19,316                                 |
| Coordinate system         | OSGB 1936 / British National Grid (EPSG::27700) |
| Channels                  | 3, uint8                                        |
| Reconstruction parameters |                                                 |
| Blending mode             | Mosaic                                          |
| Surface                   | Mesh                                            |



Enable color correction

Enable hole filling

Processing time

No

Yes

43 minutes 38 seconds

**Software**

Version

Platform

1.3.2 build 4205

Linux 64
